# Supplementary material
Source: publisher figshare collection journal article supplement (https://frontiersin.figshare.com/ndownloader/files/21931599)

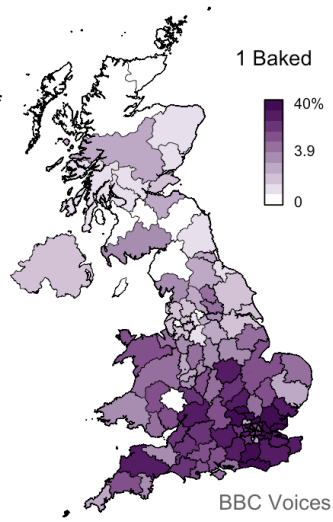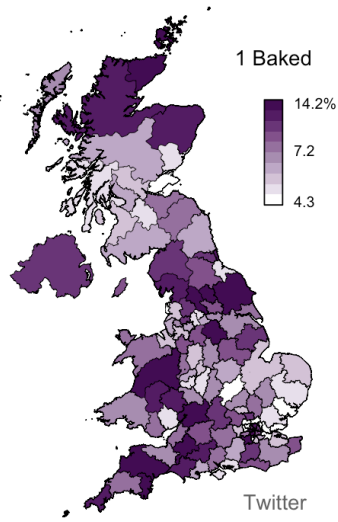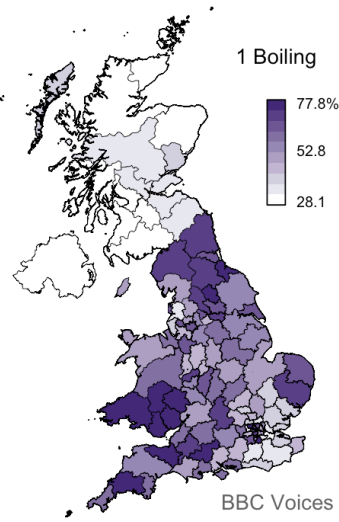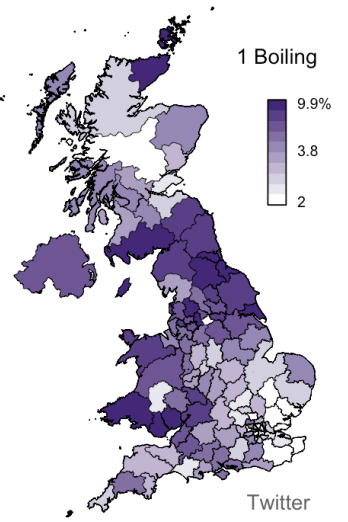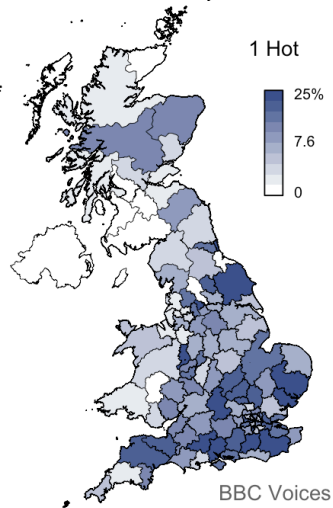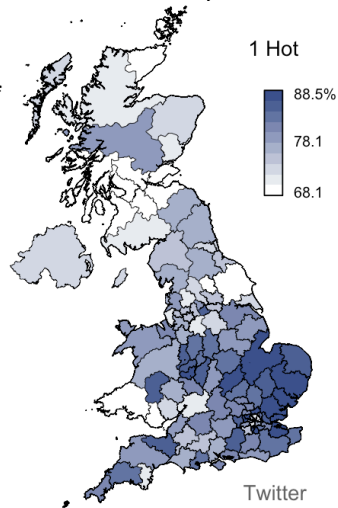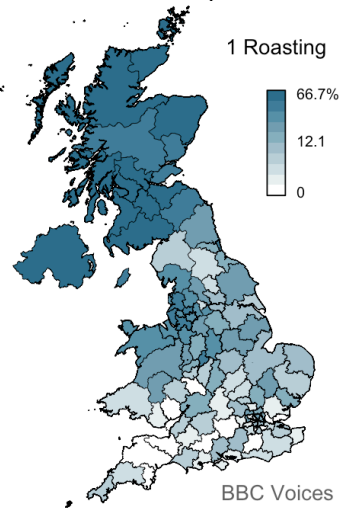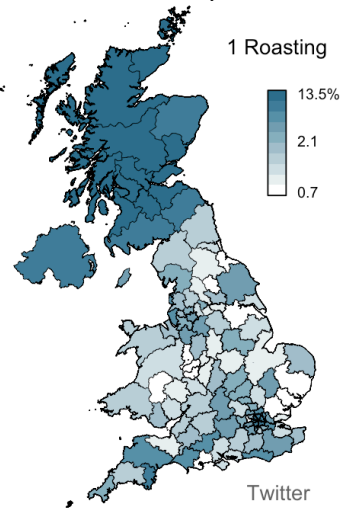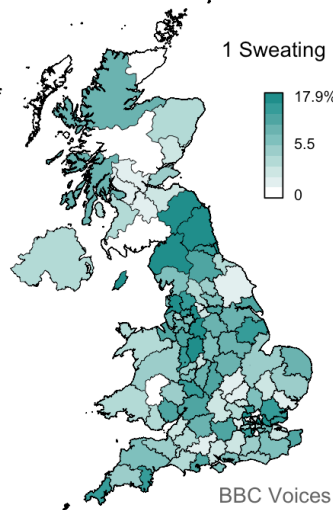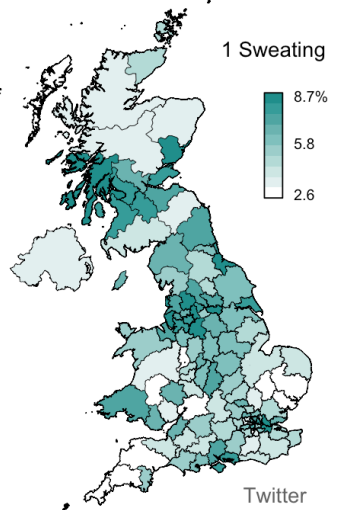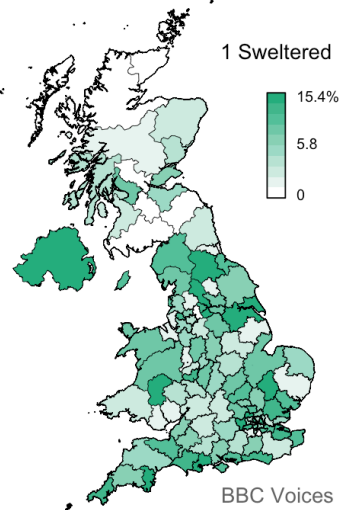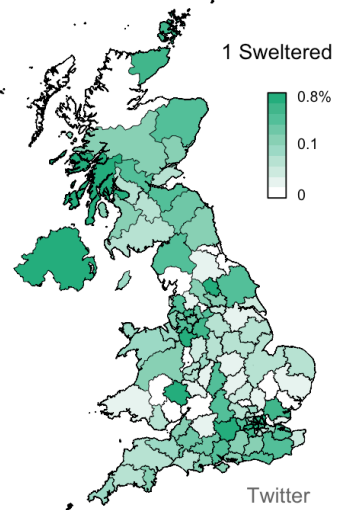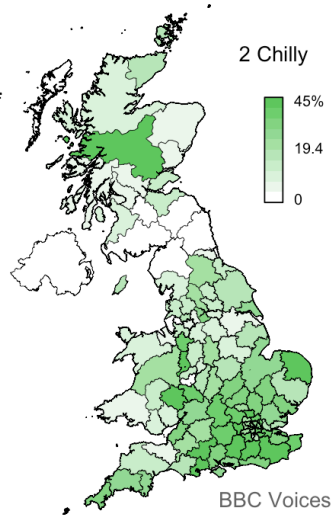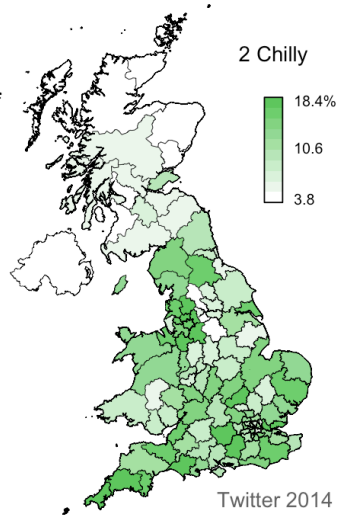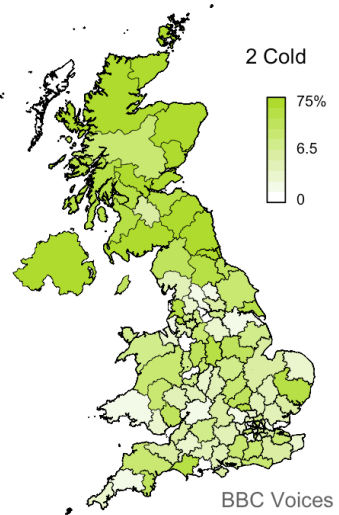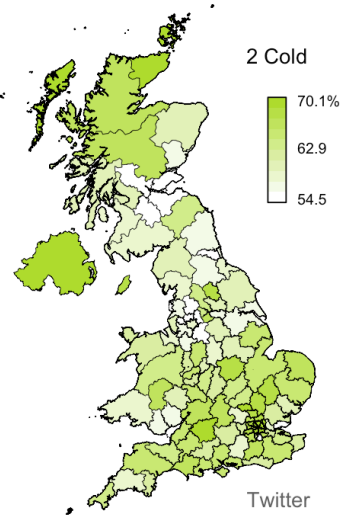

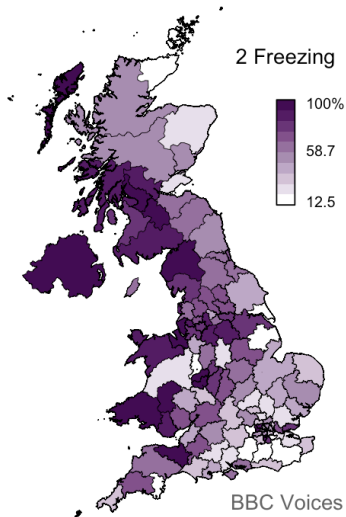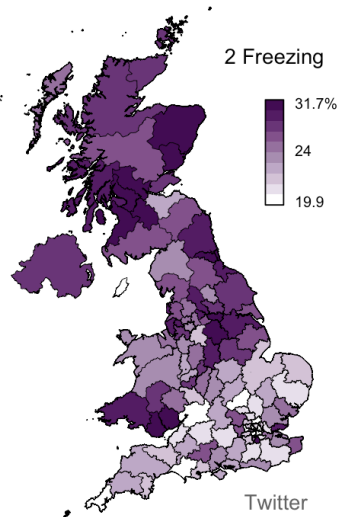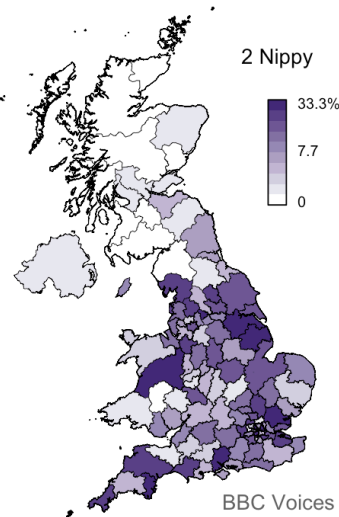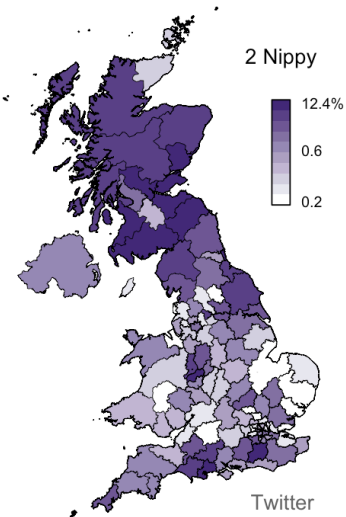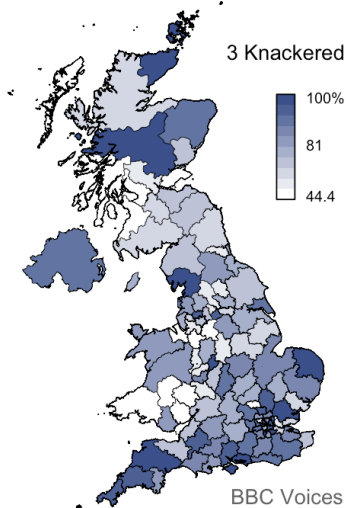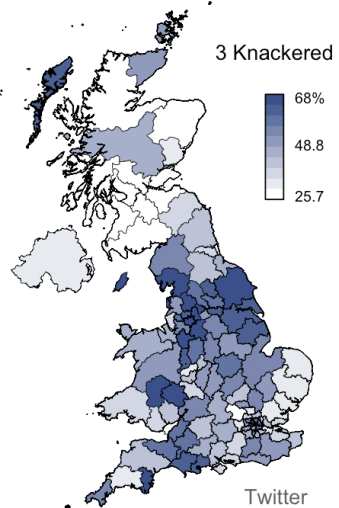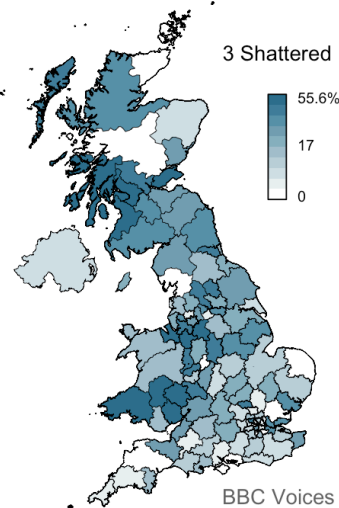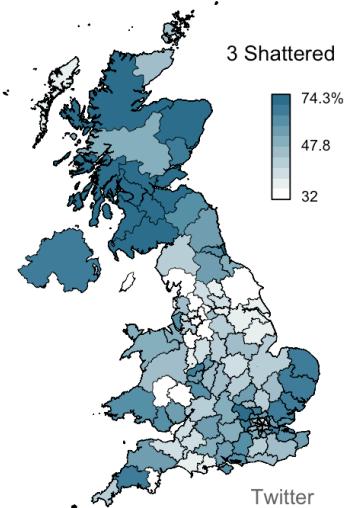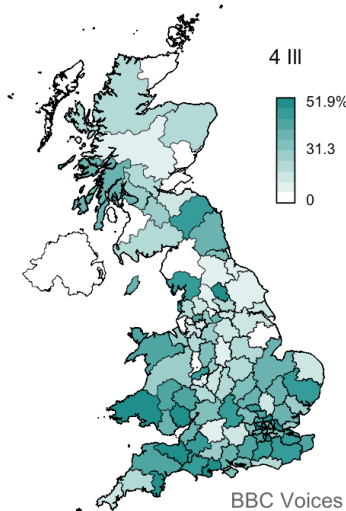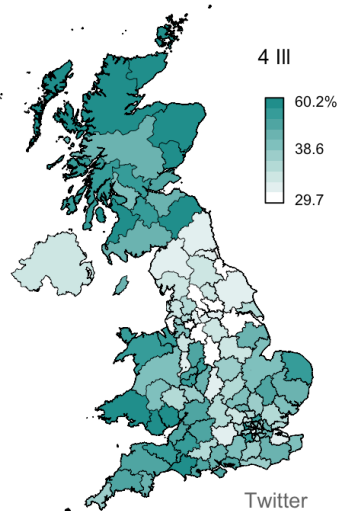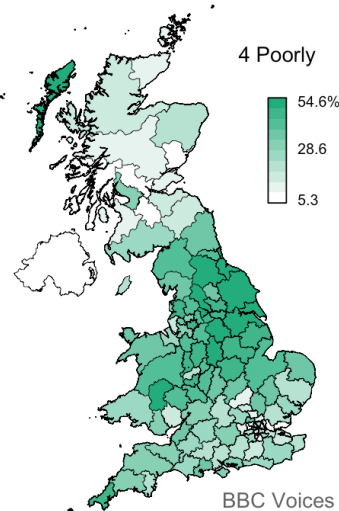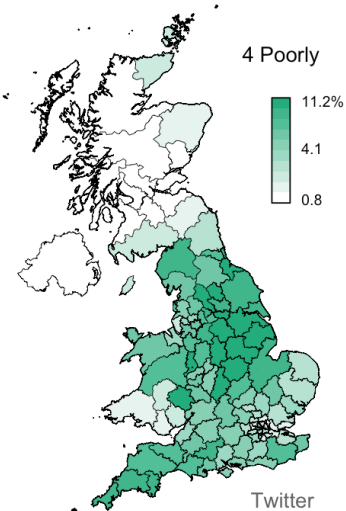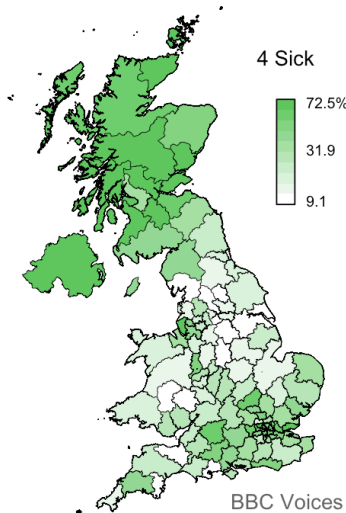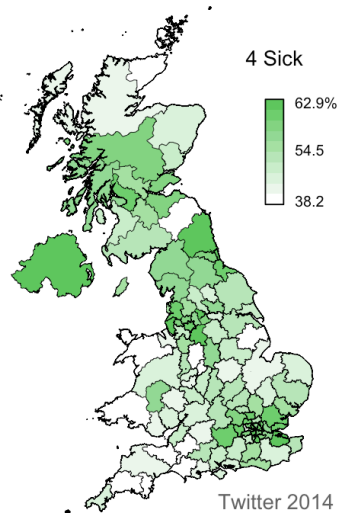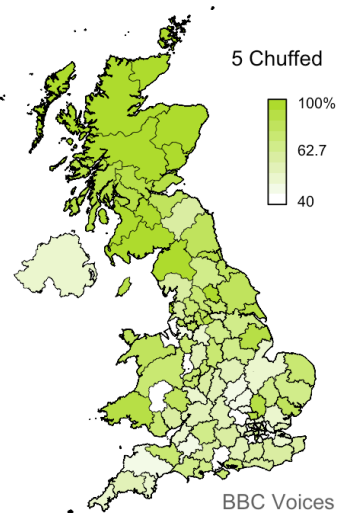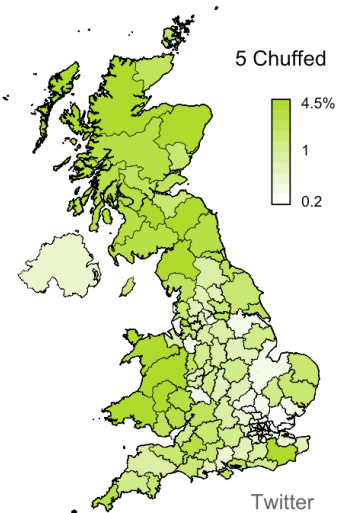

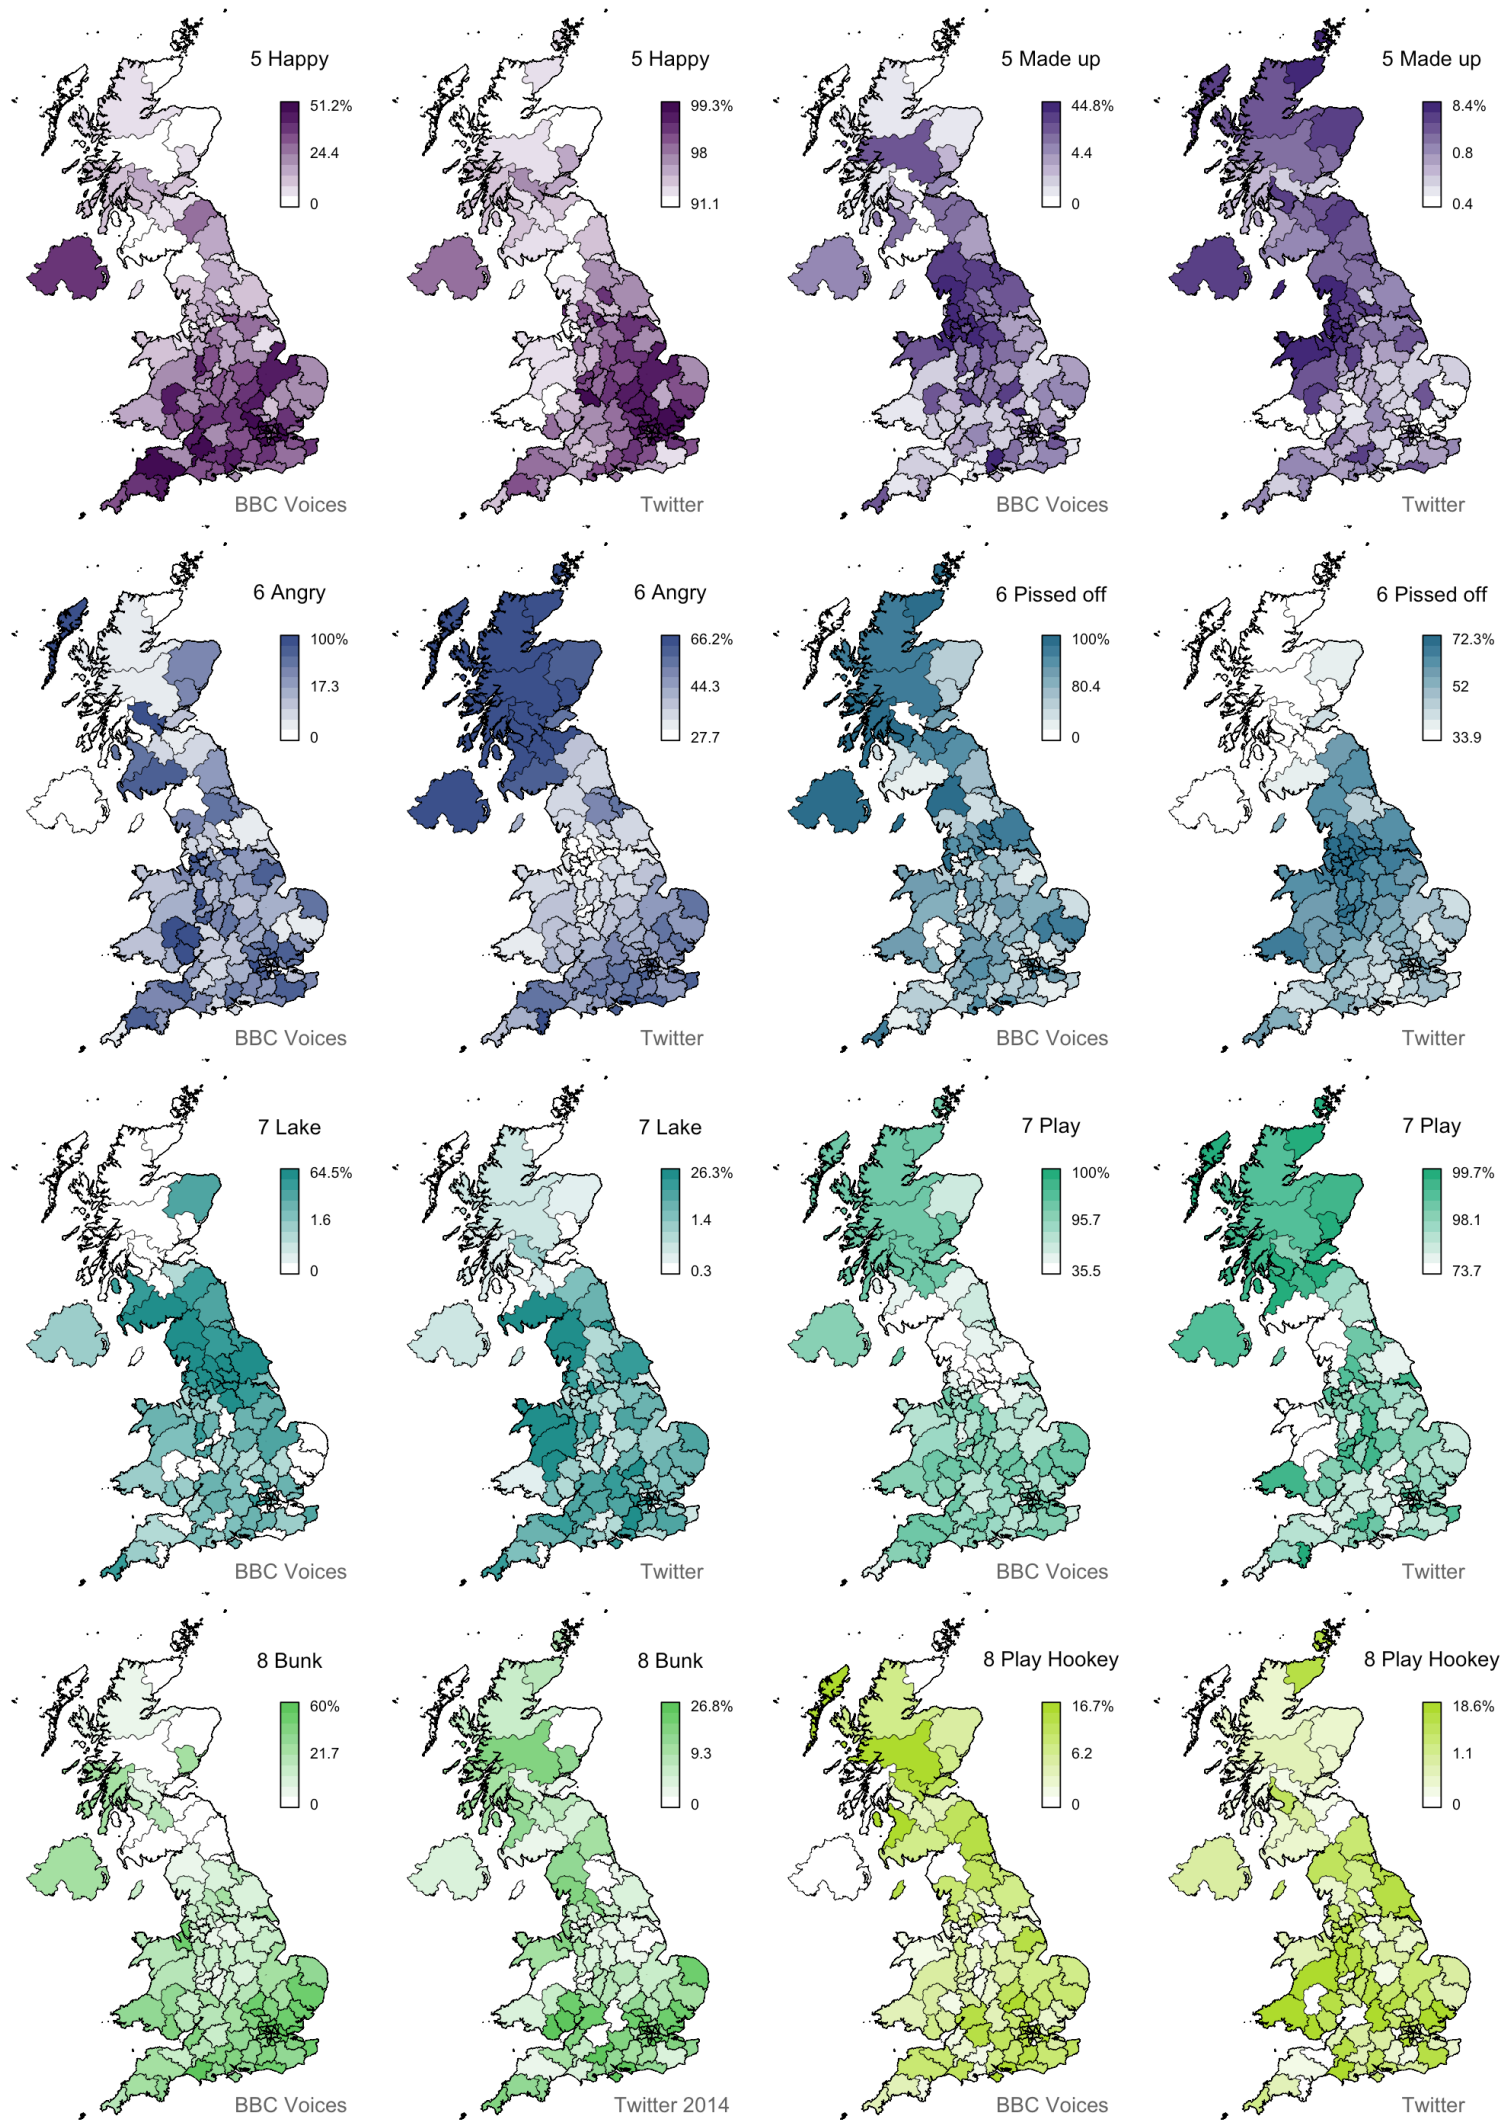

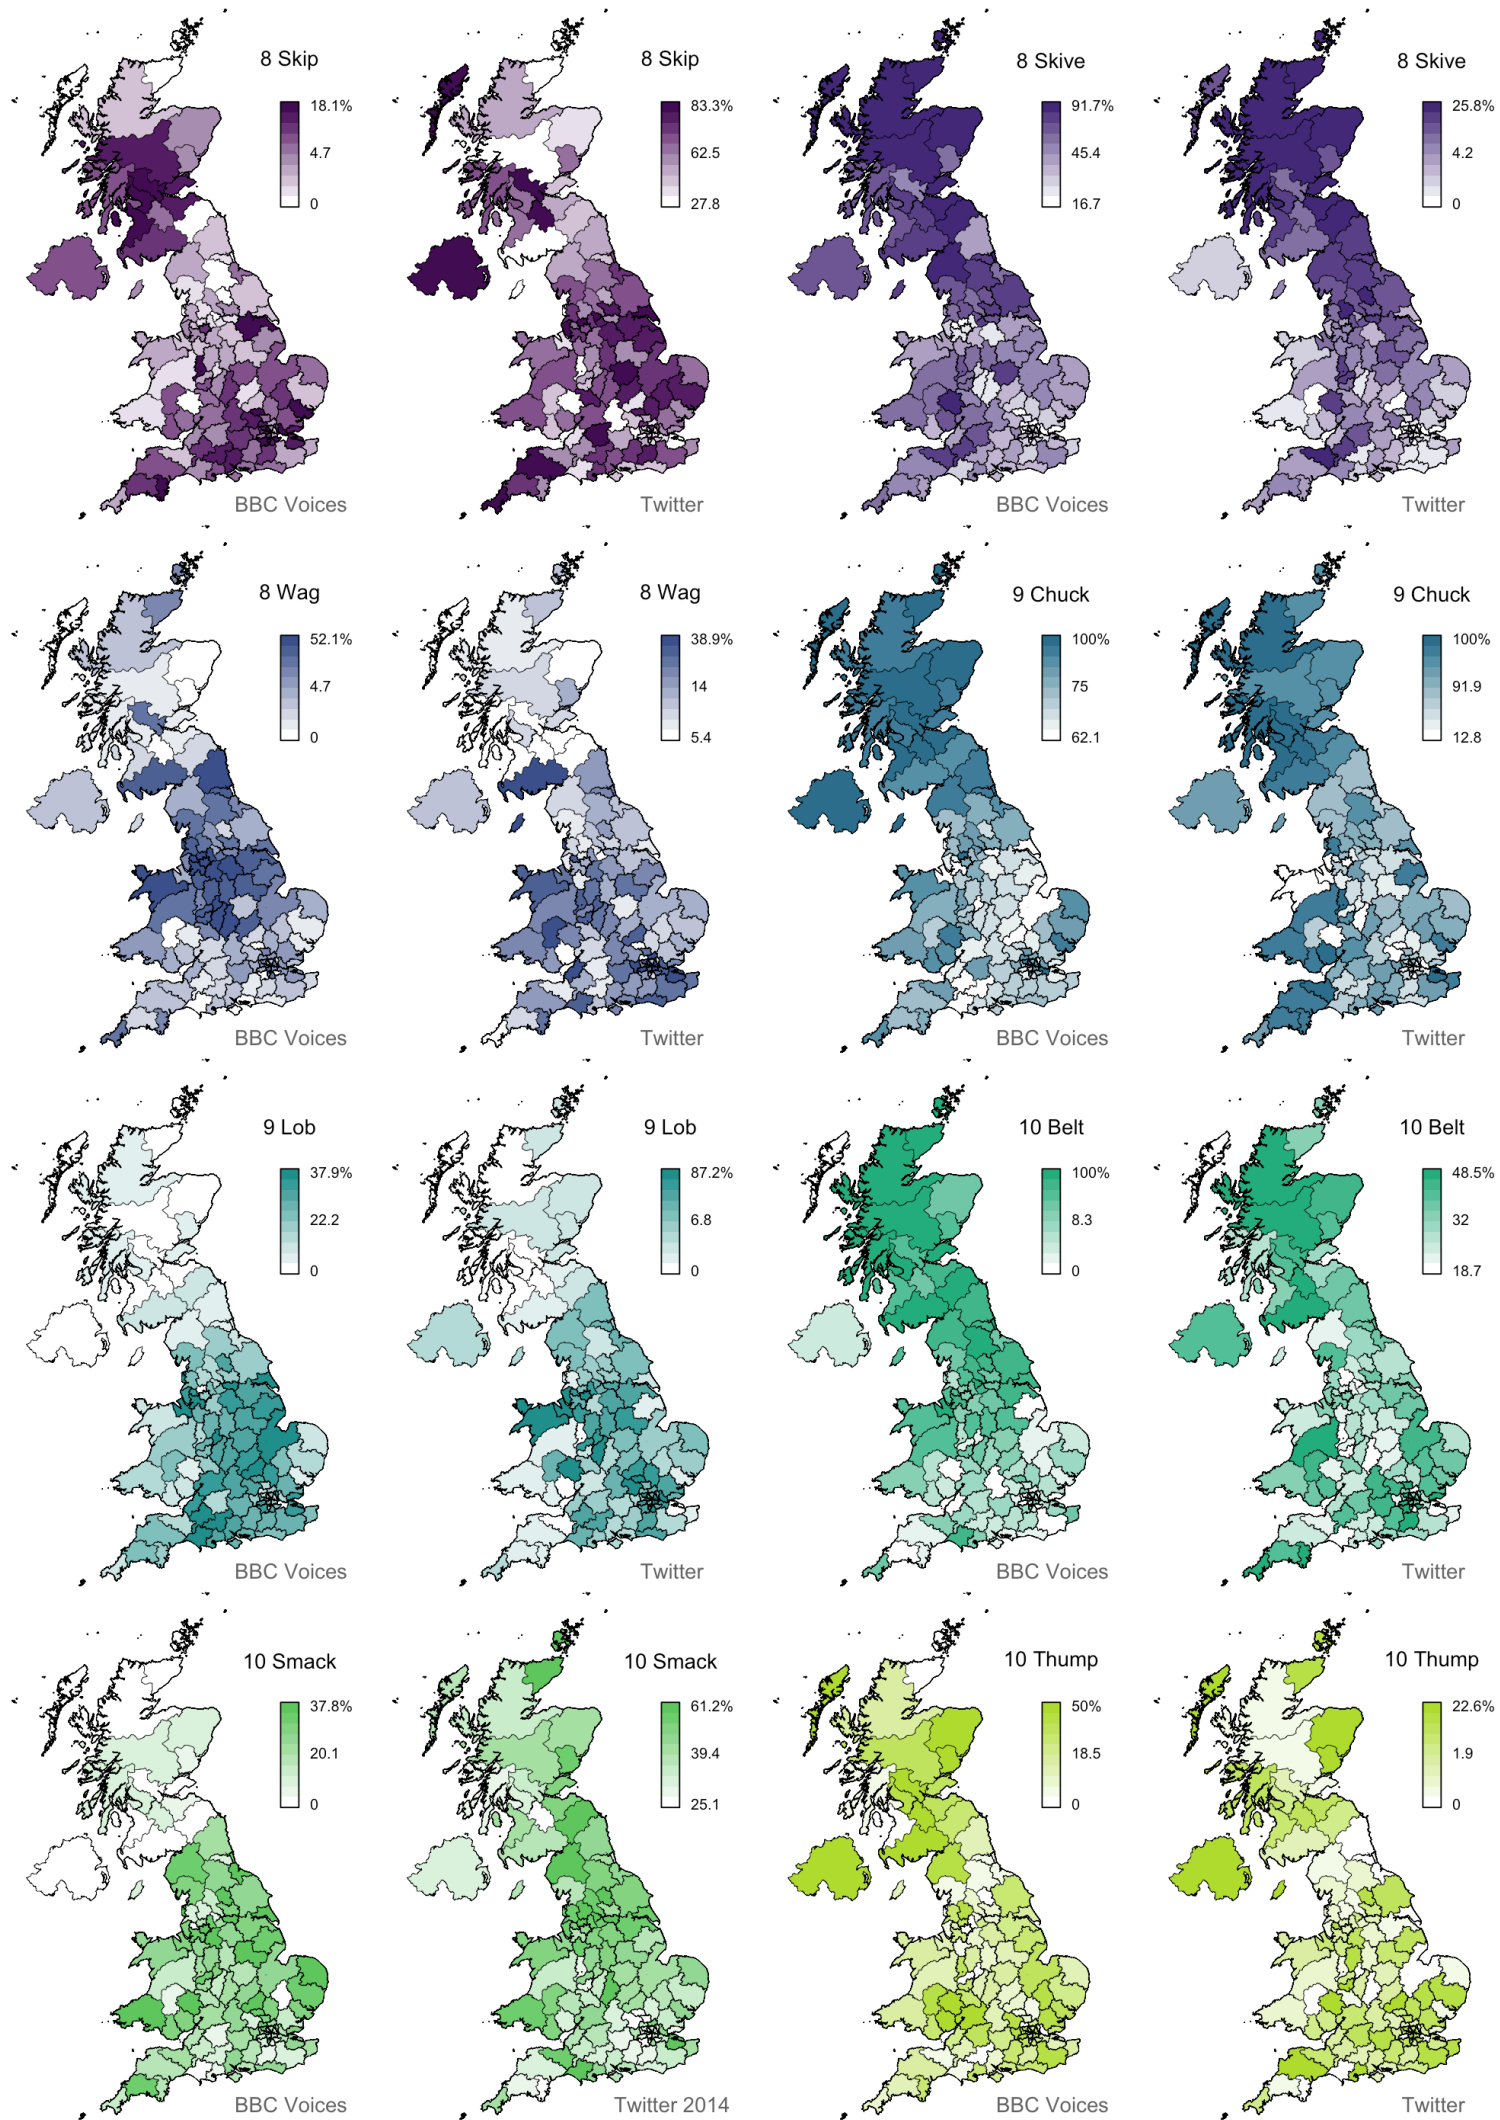

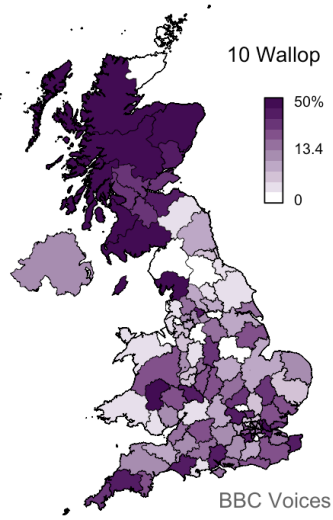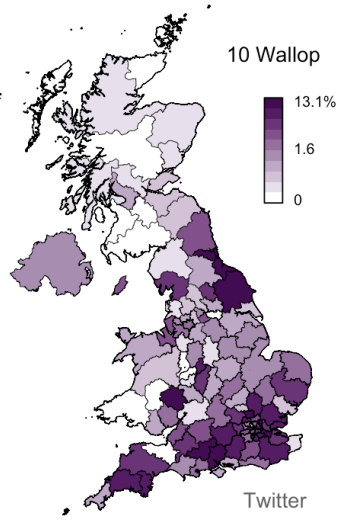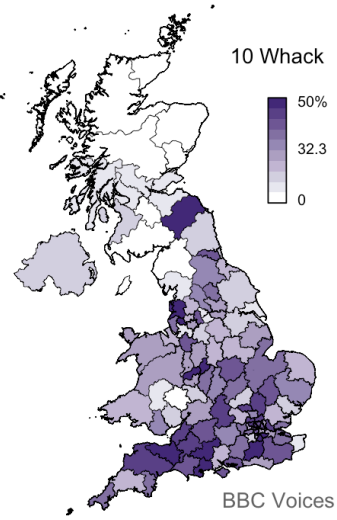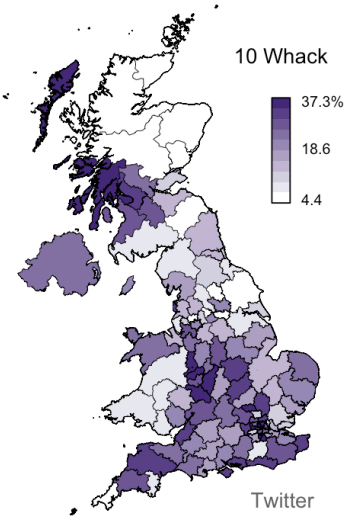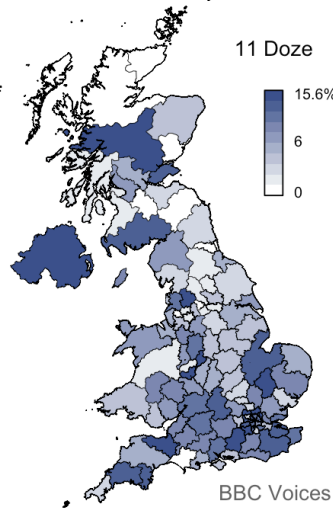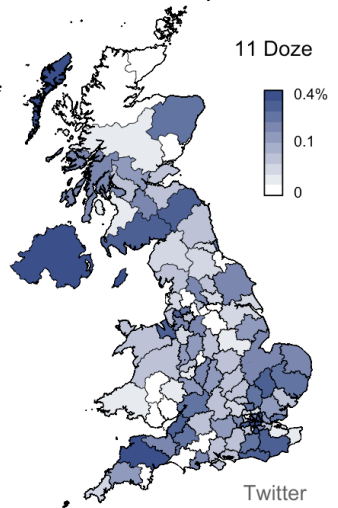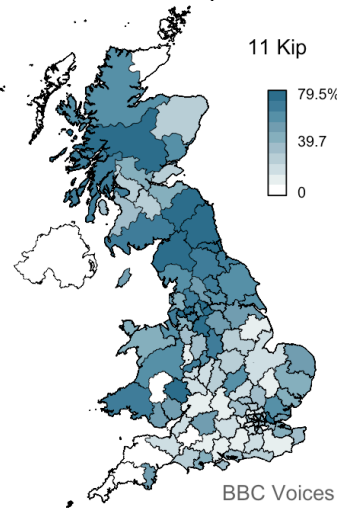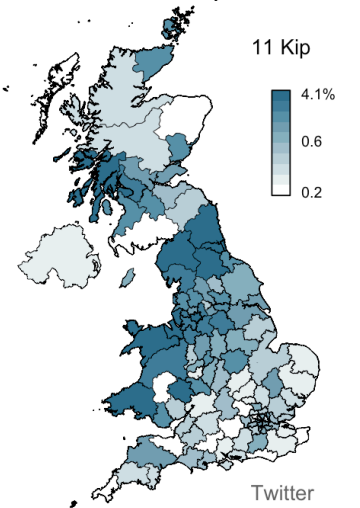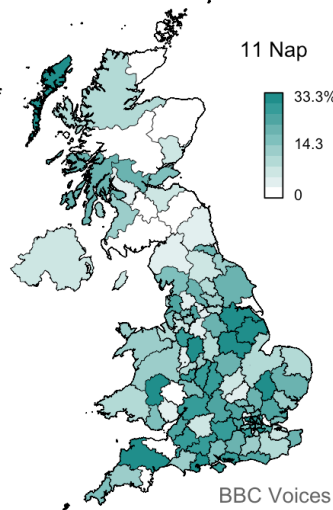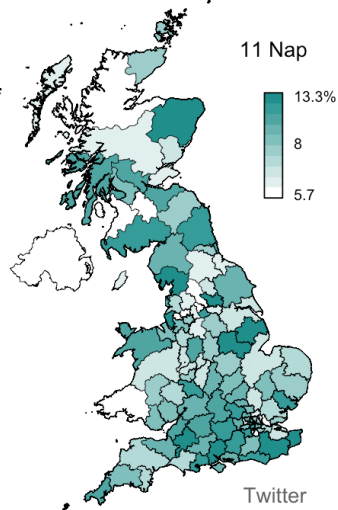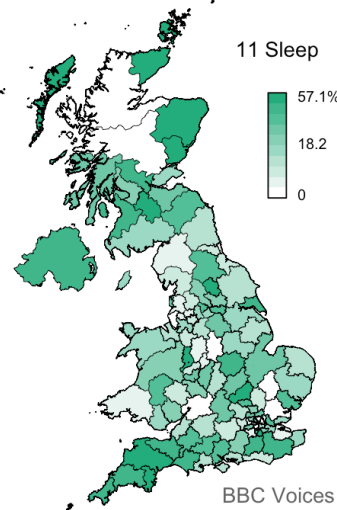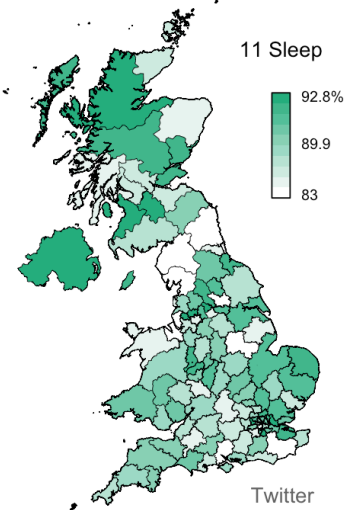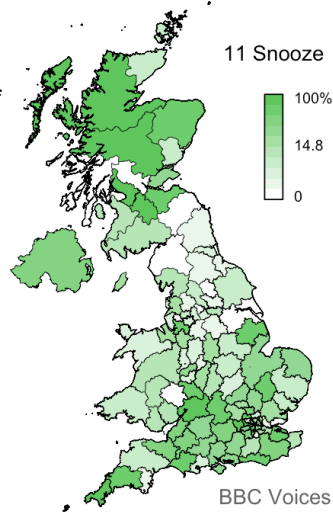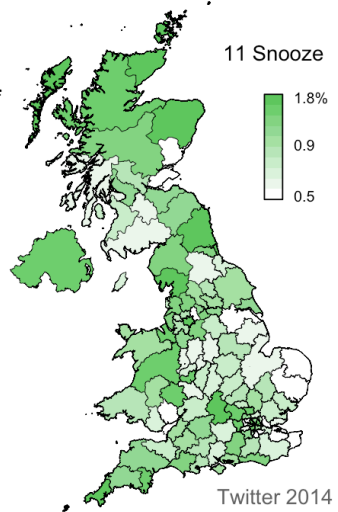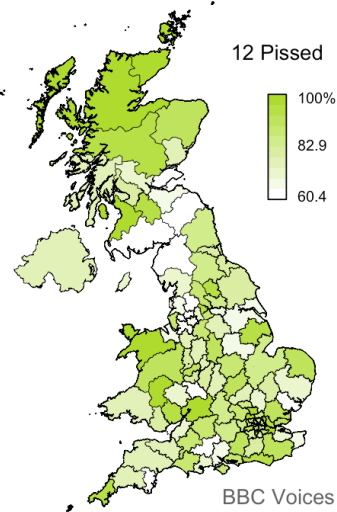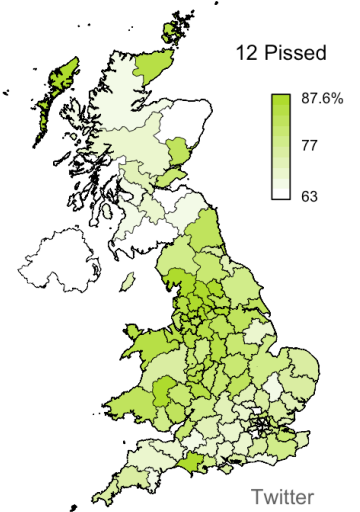

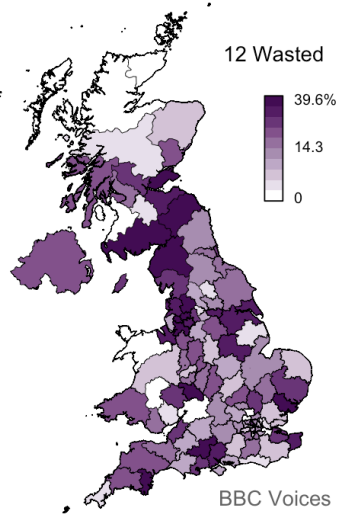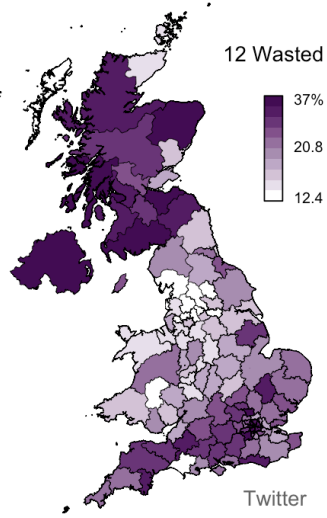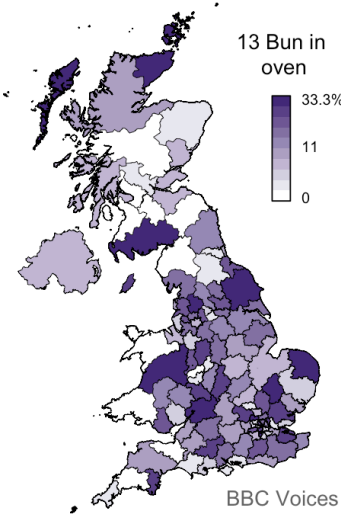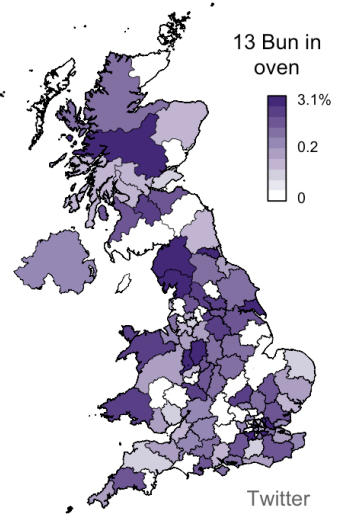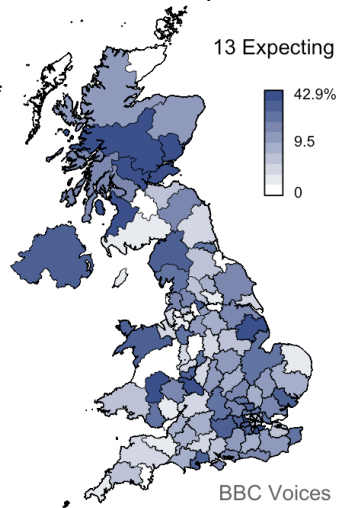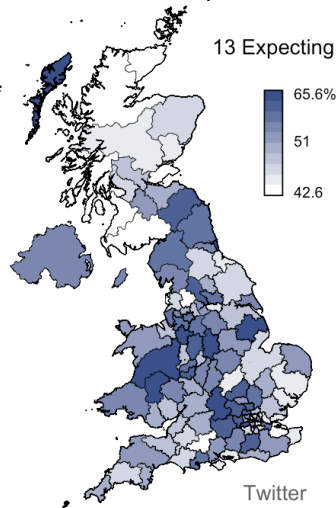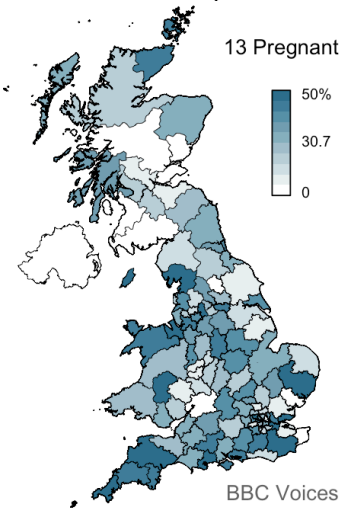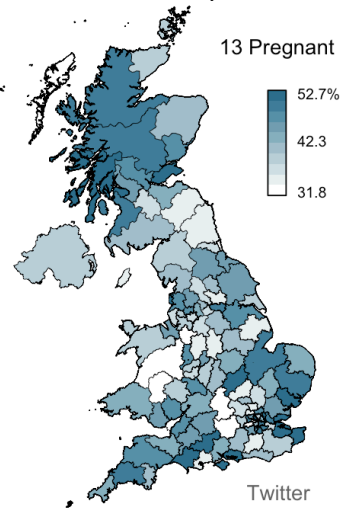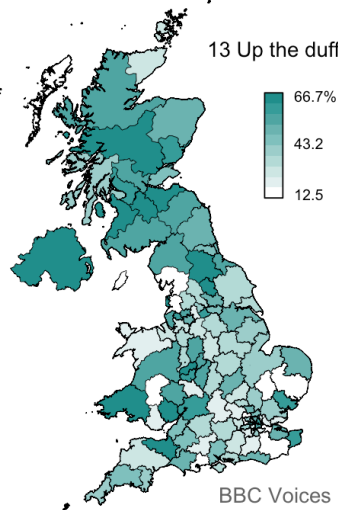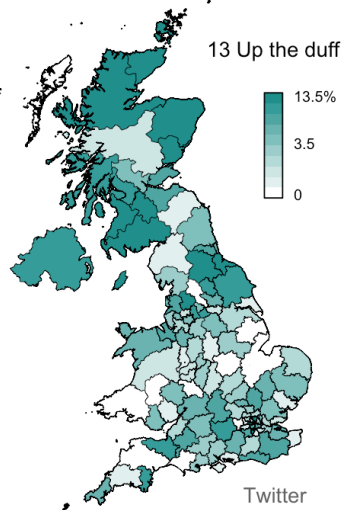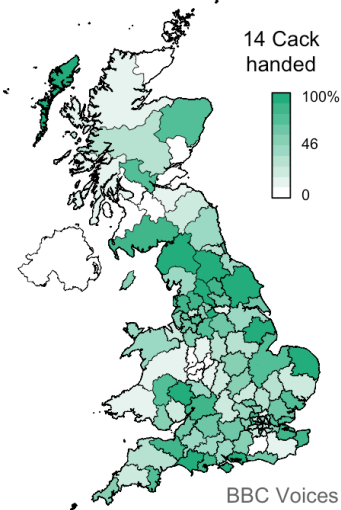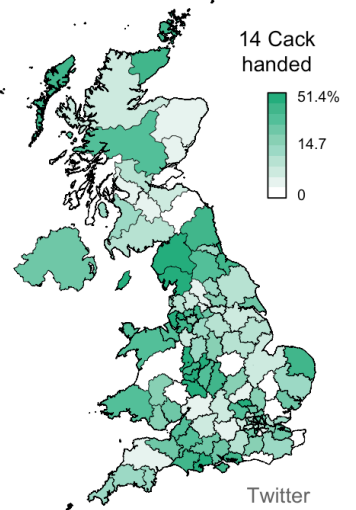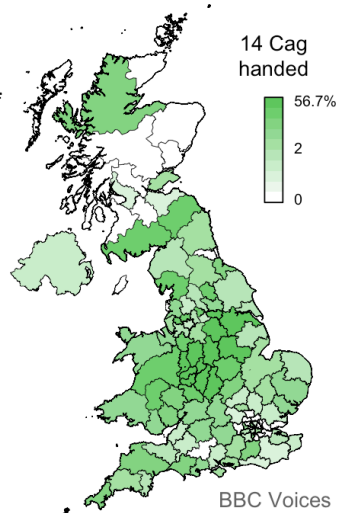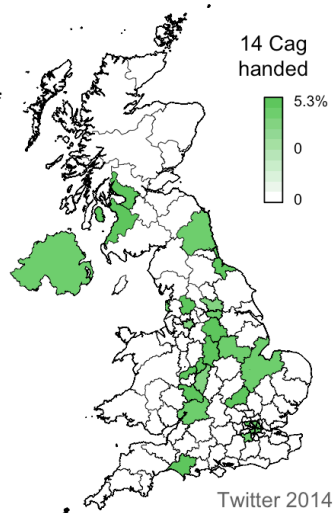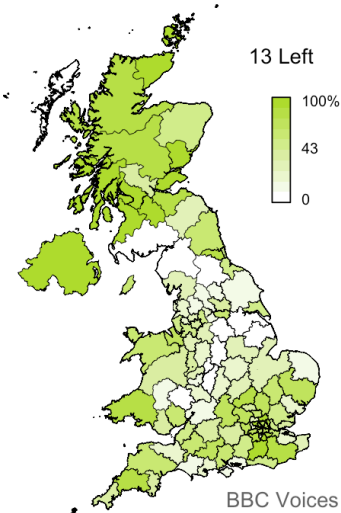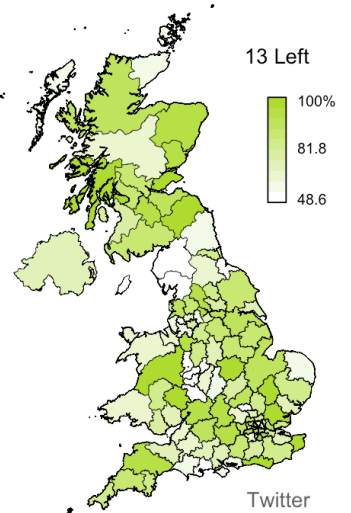

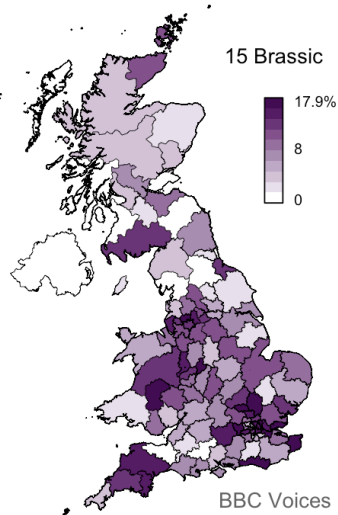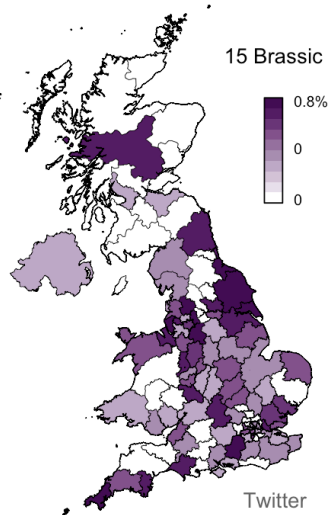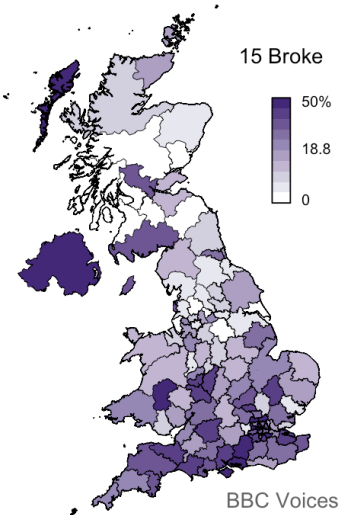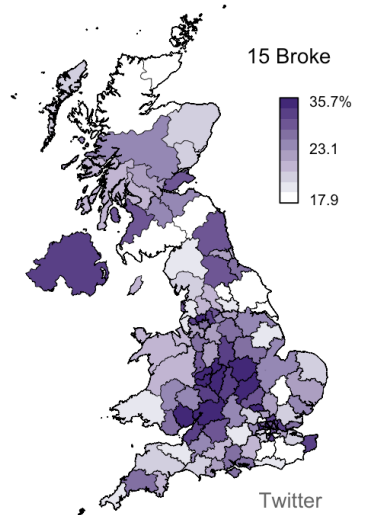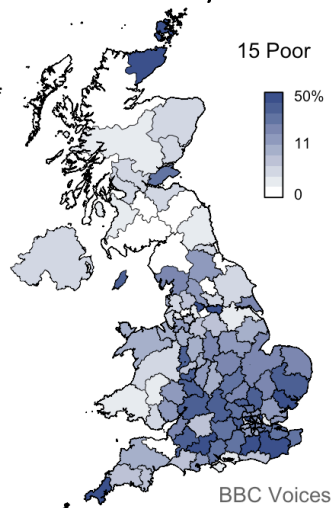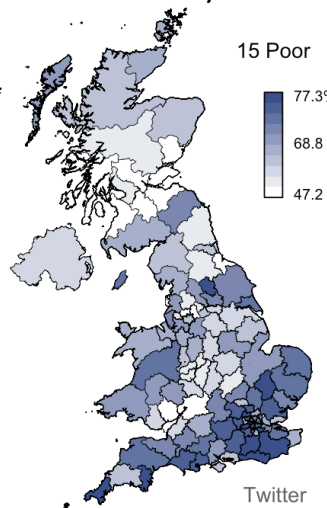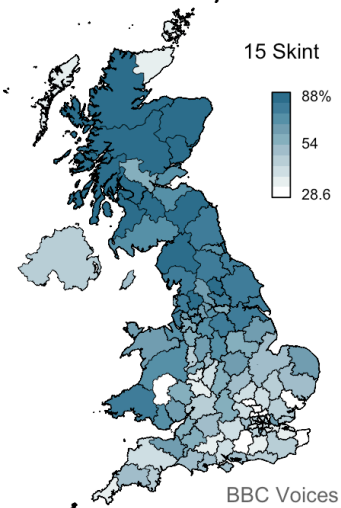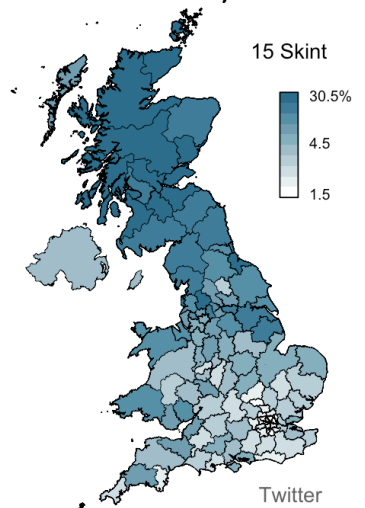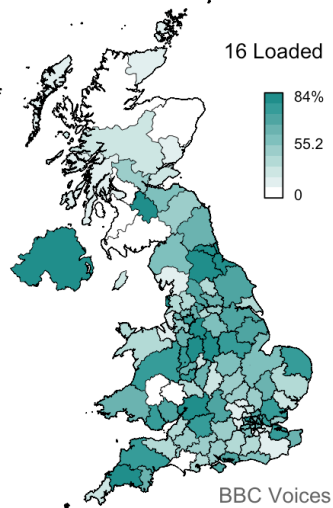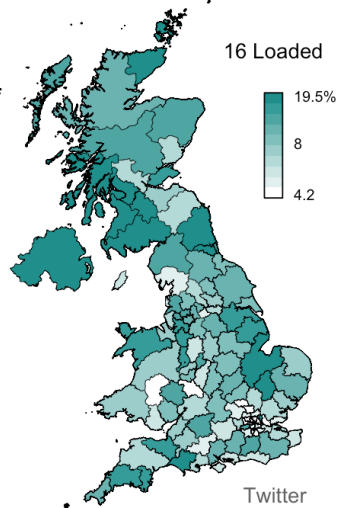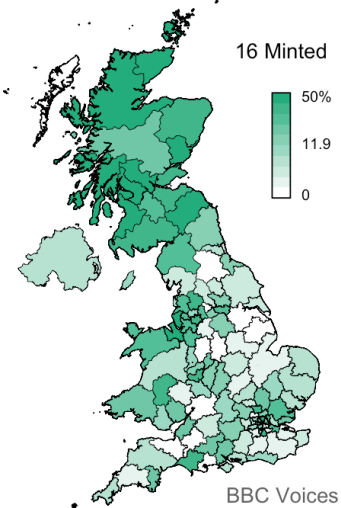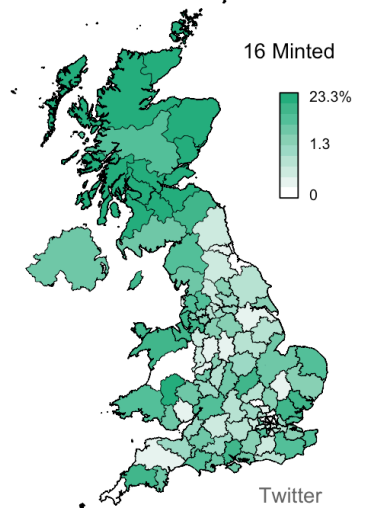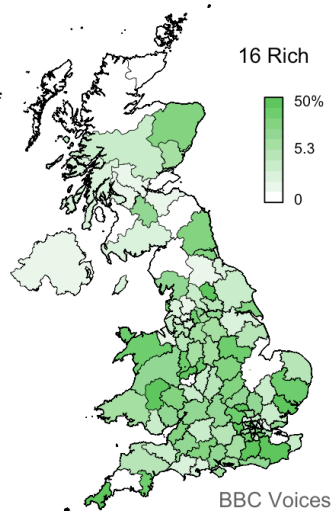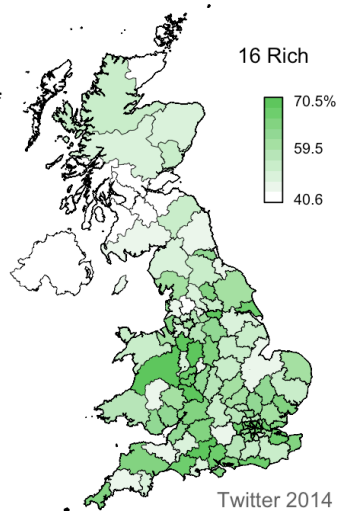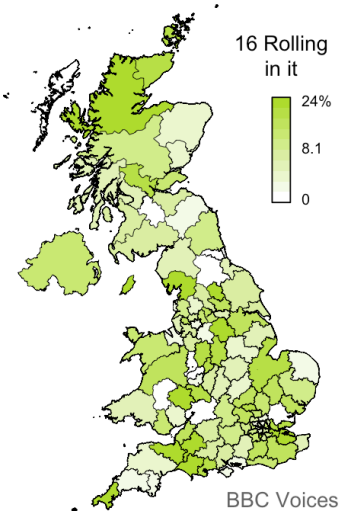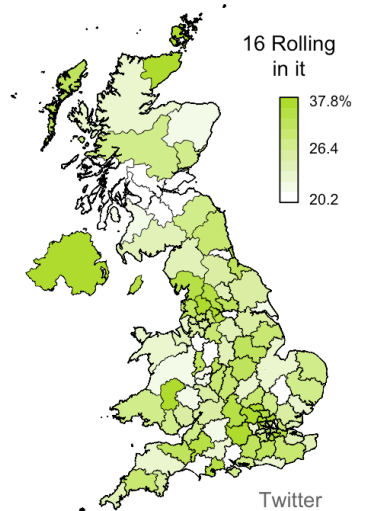

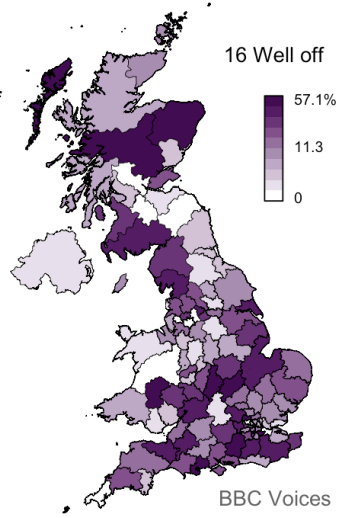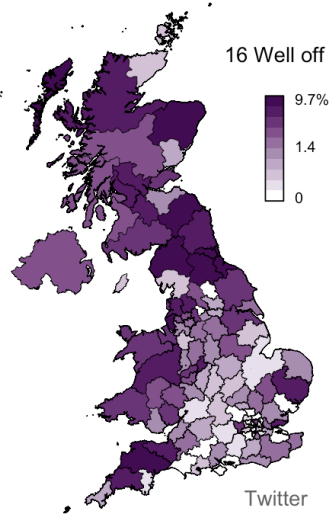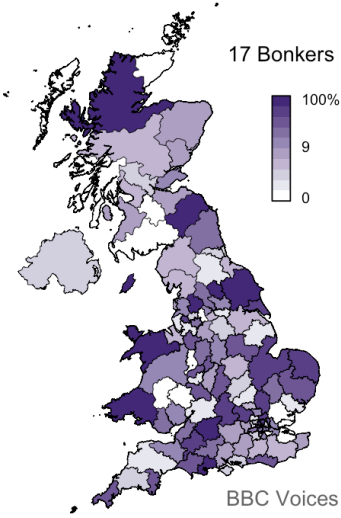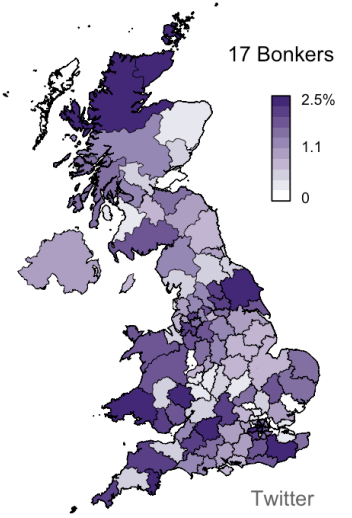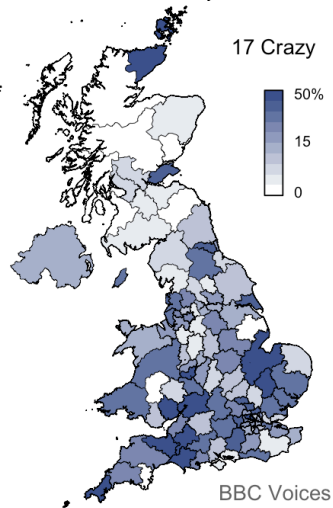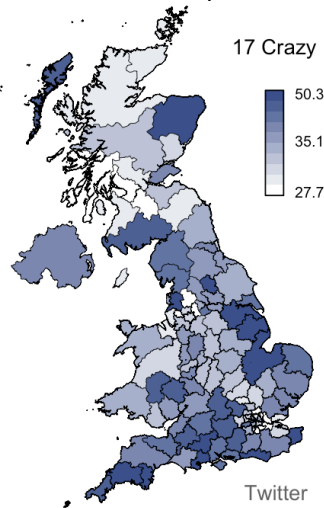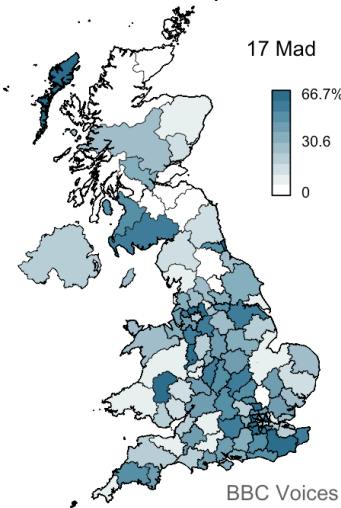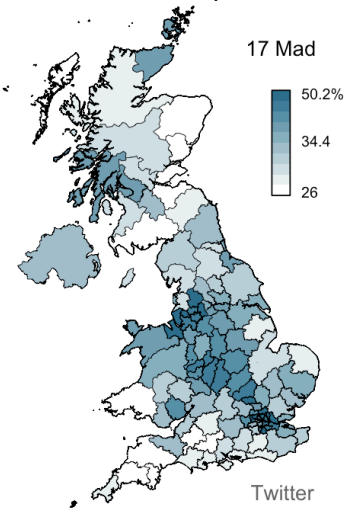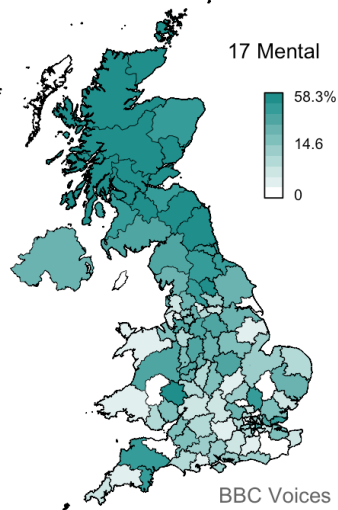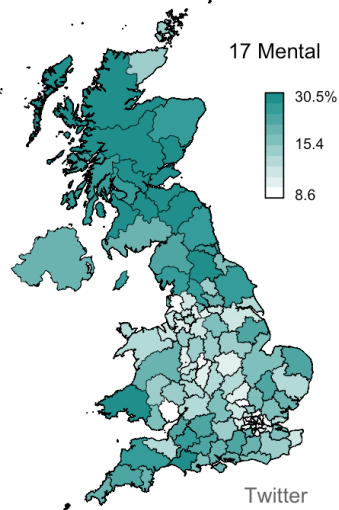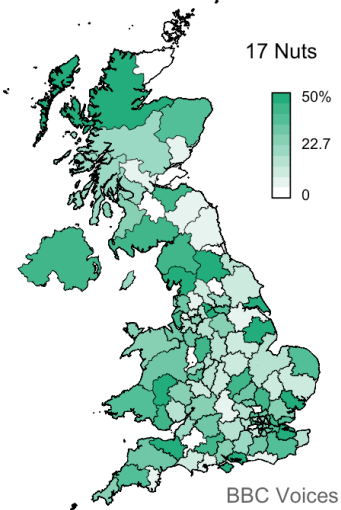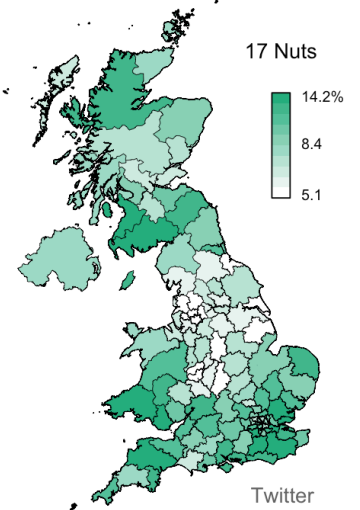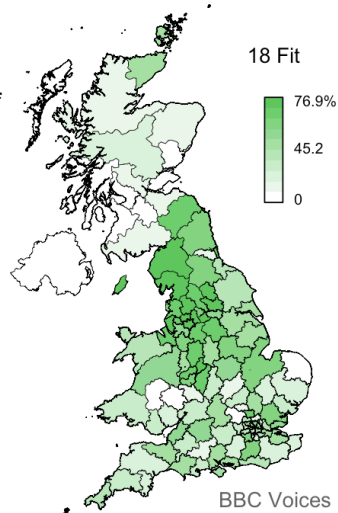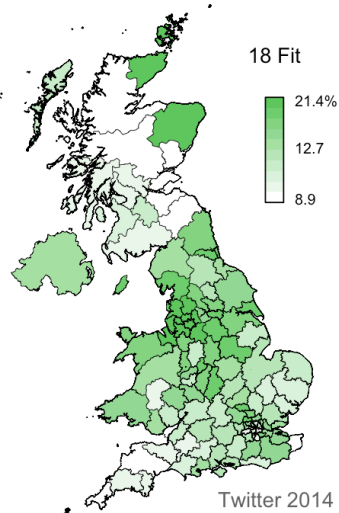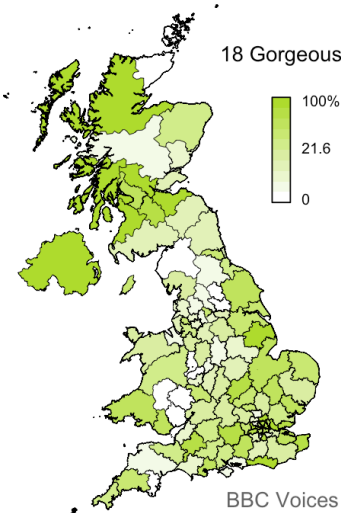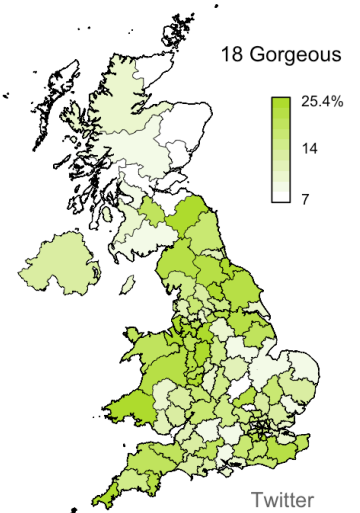

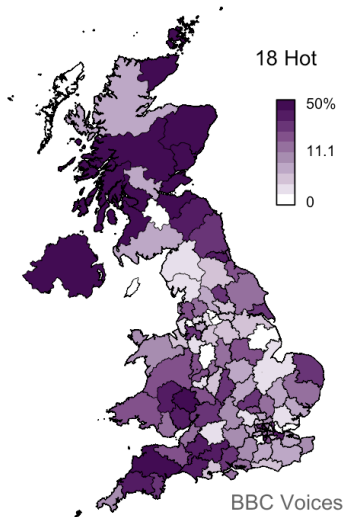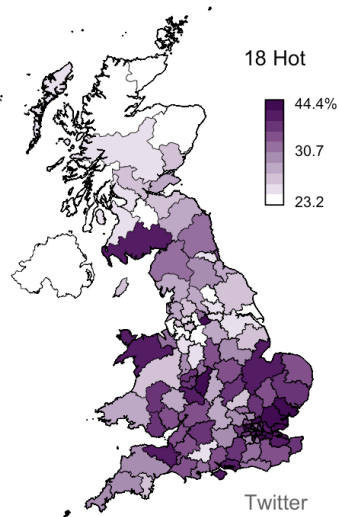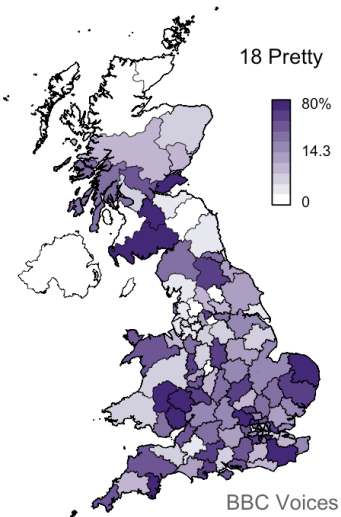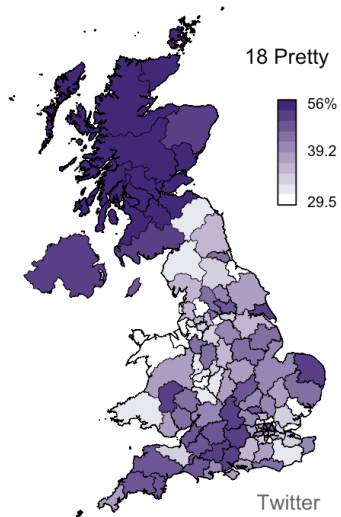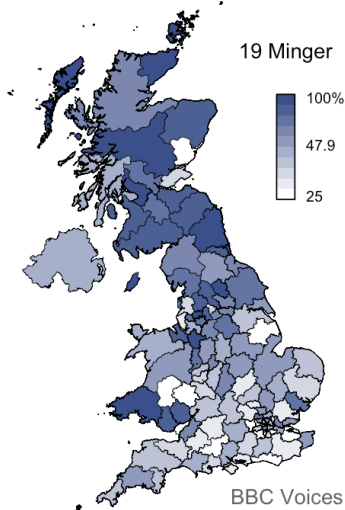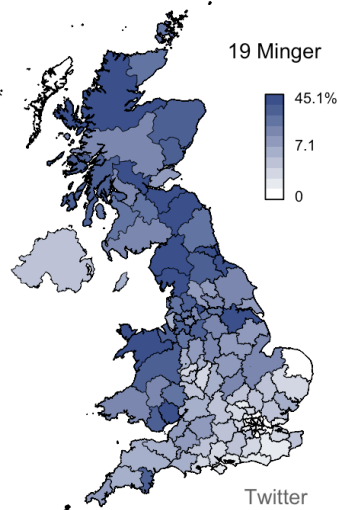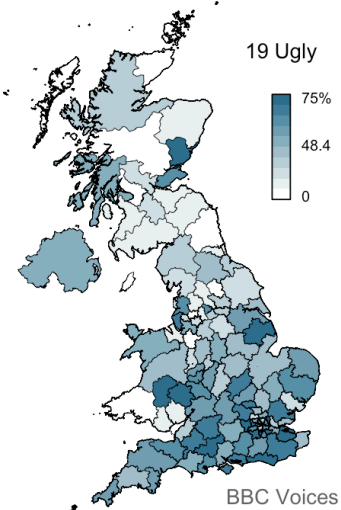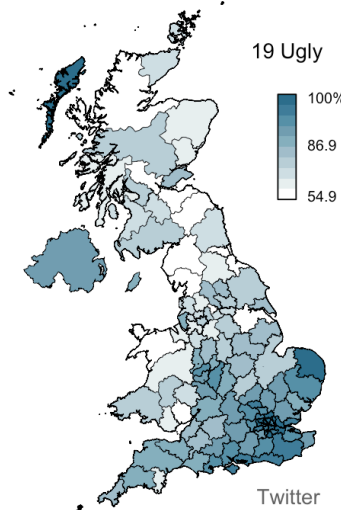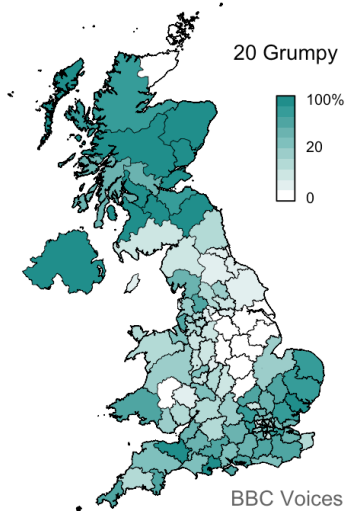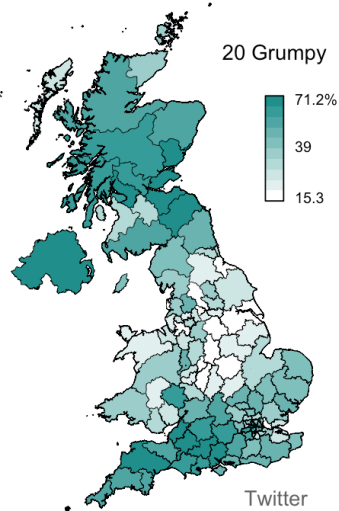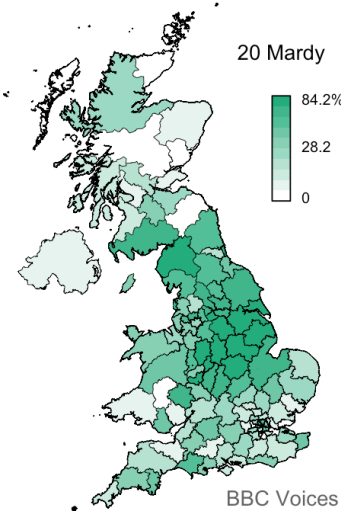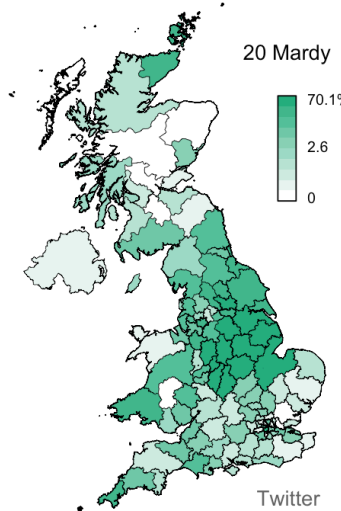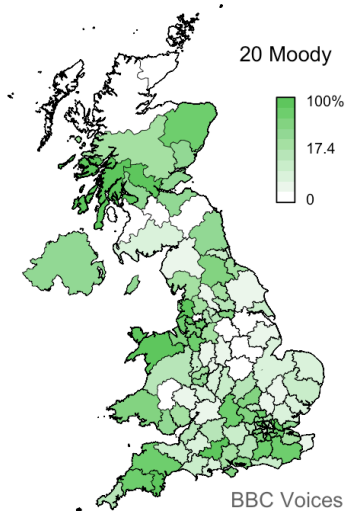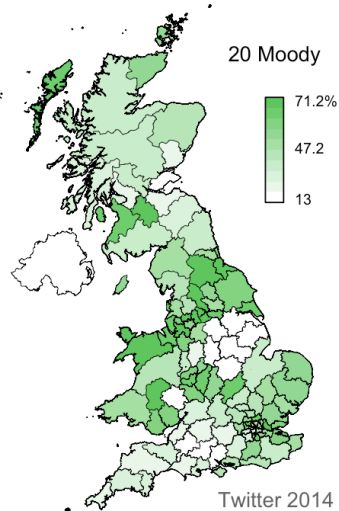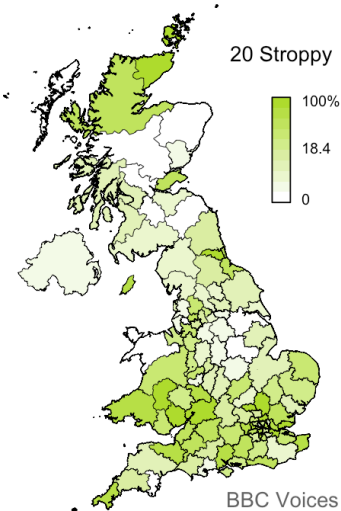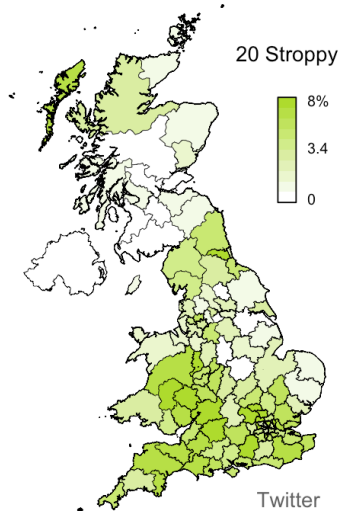

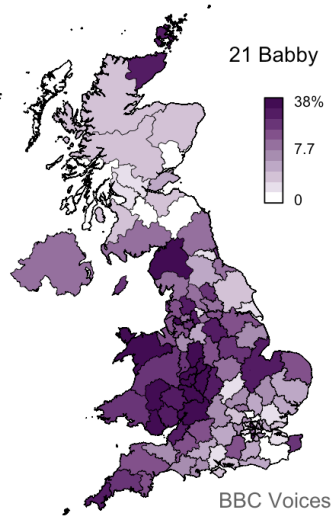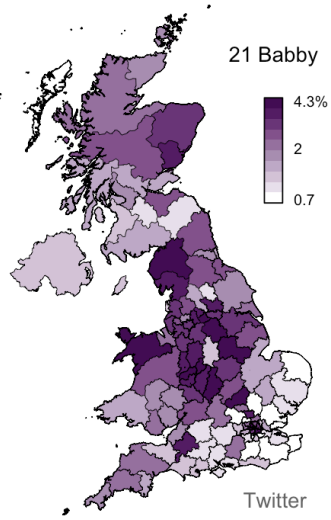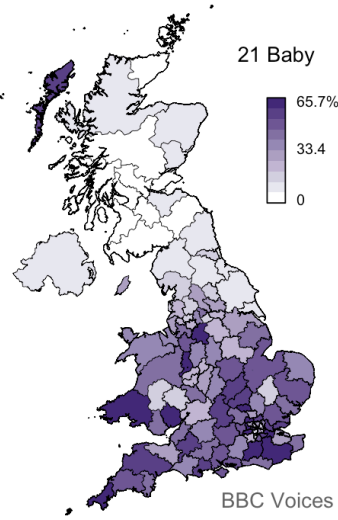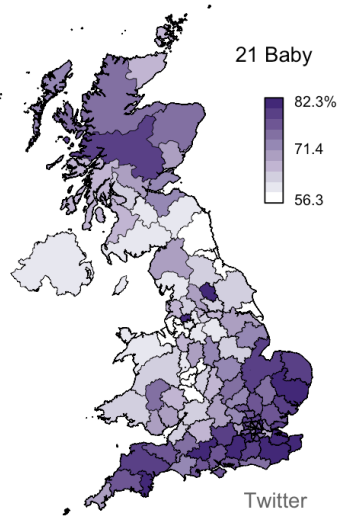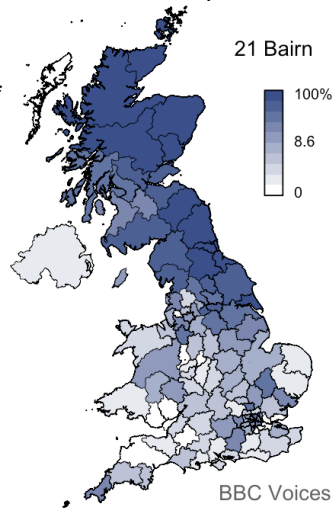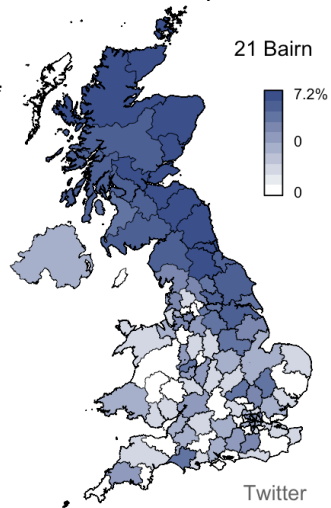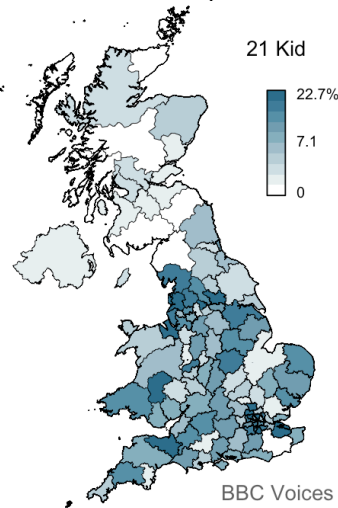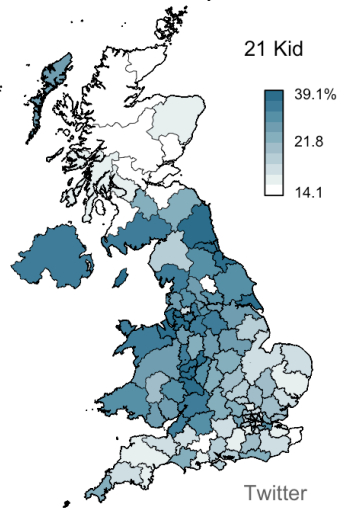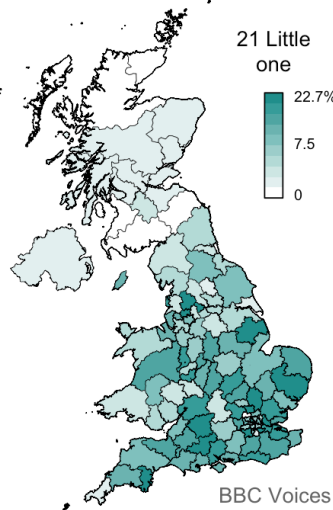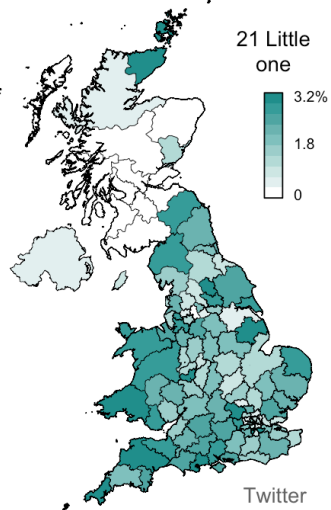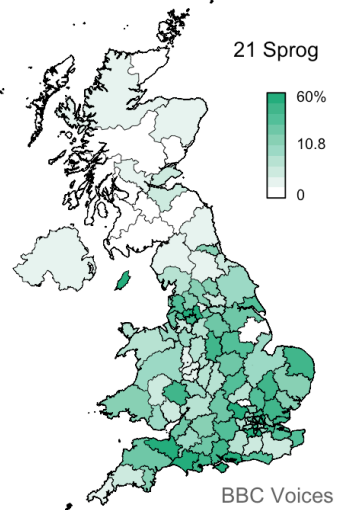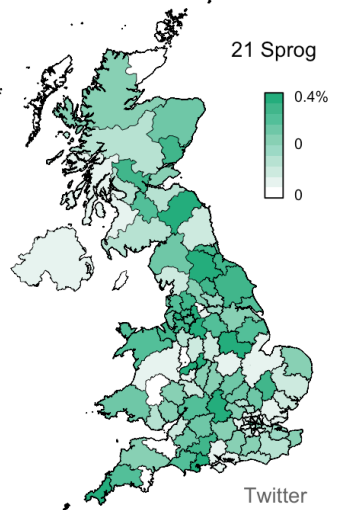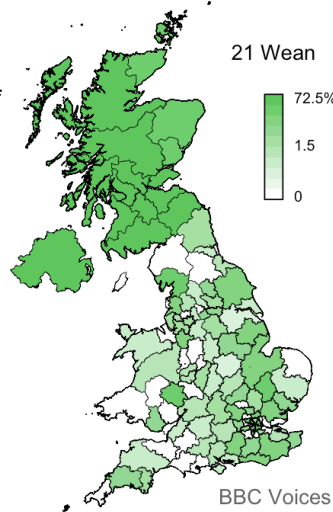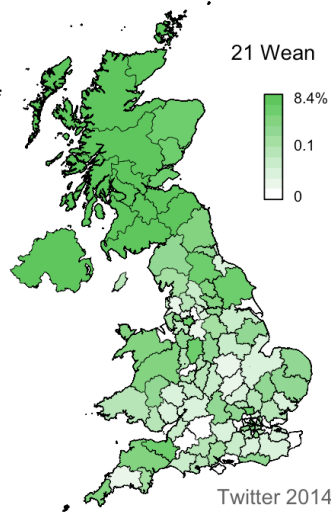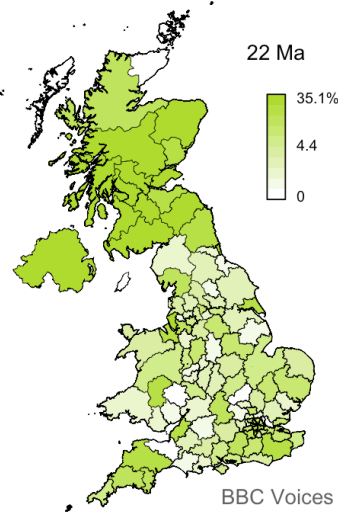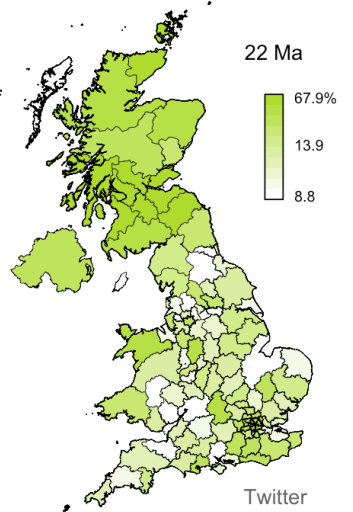

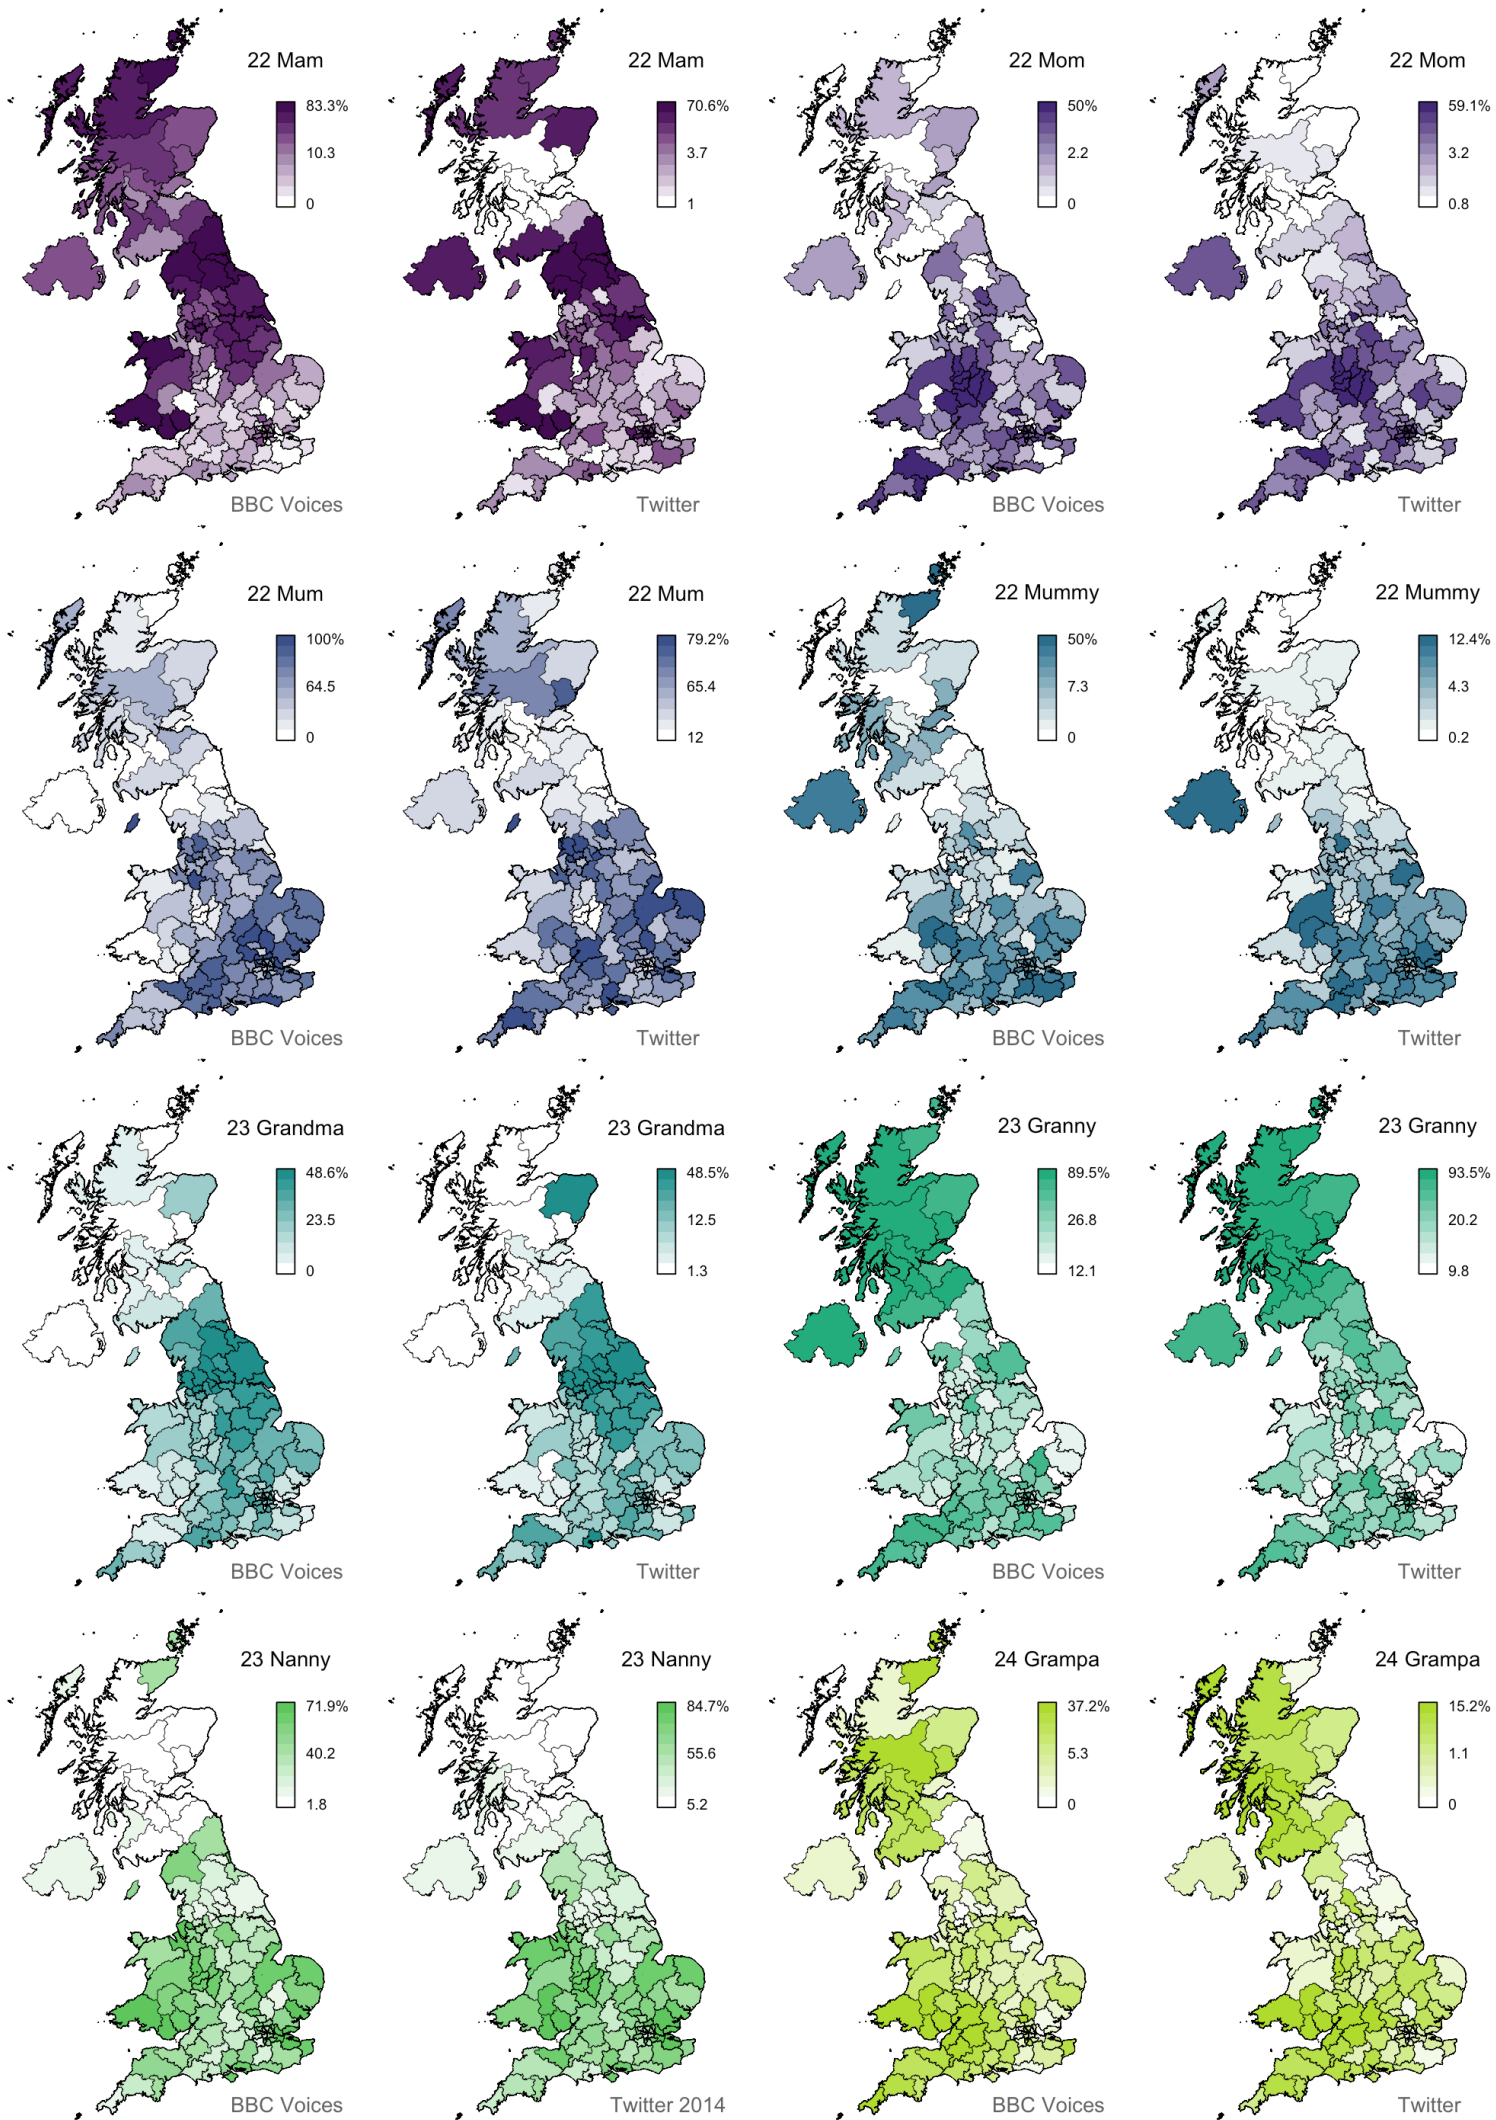

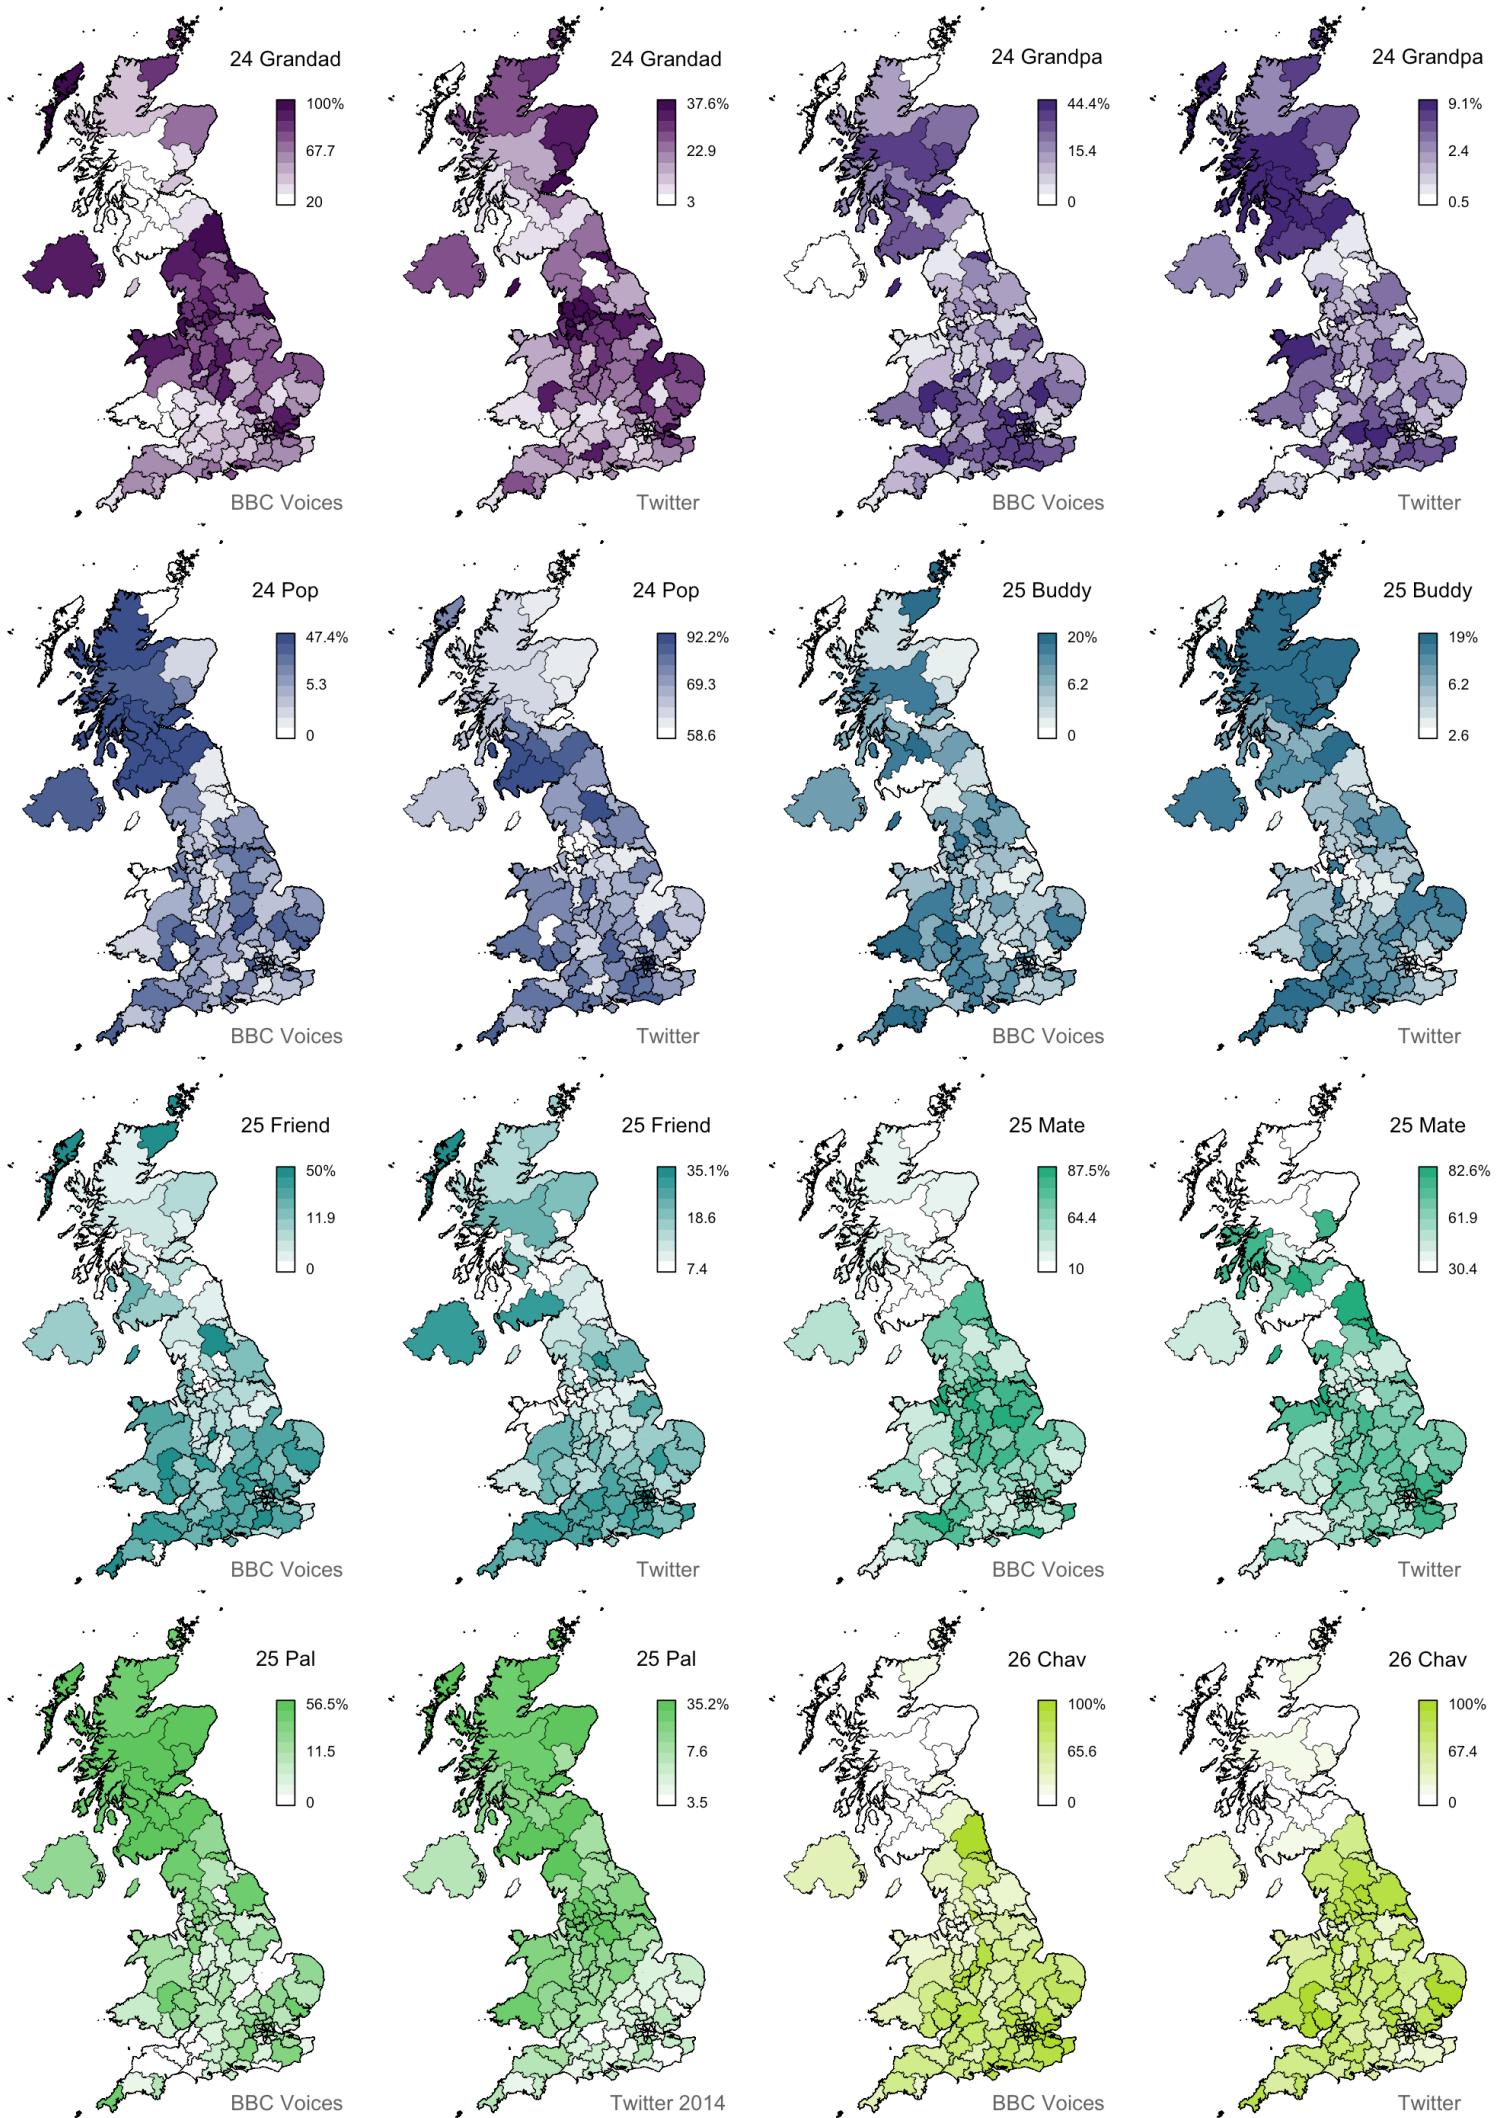

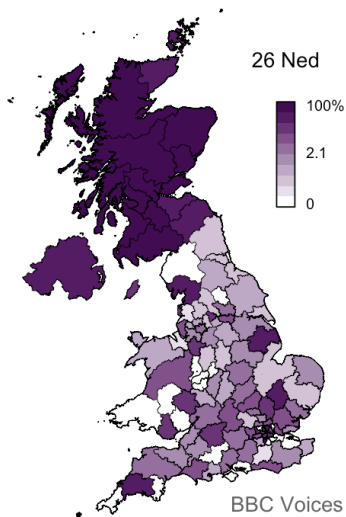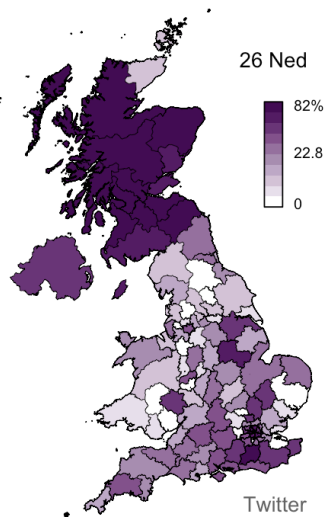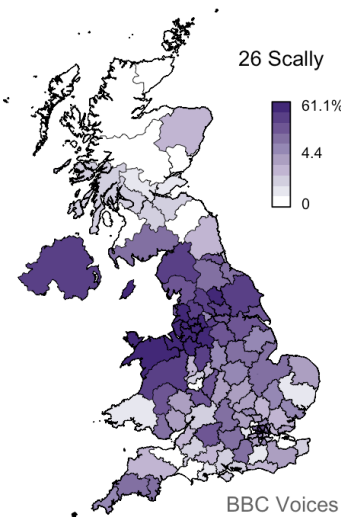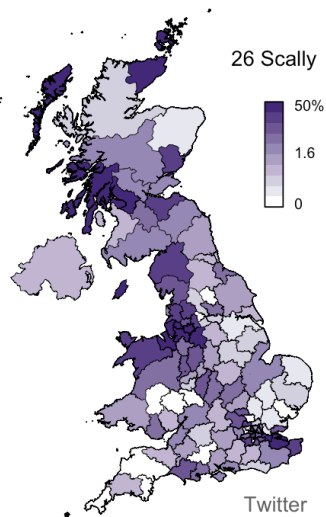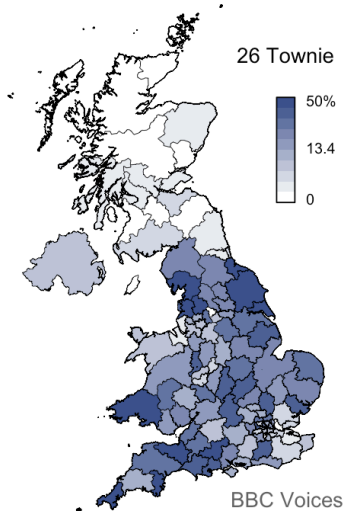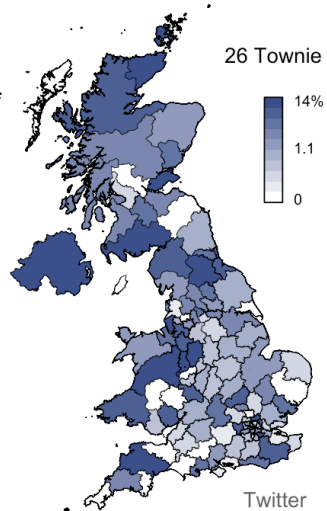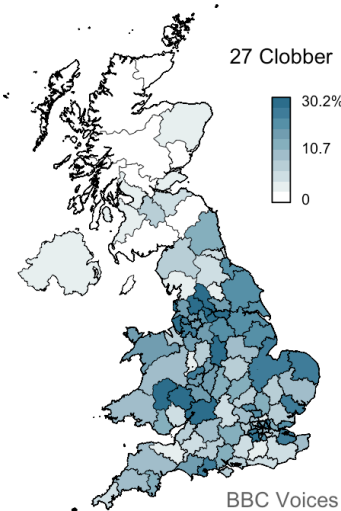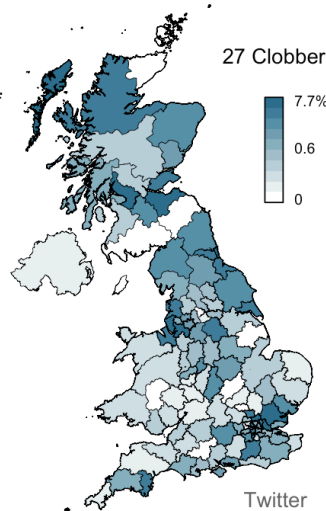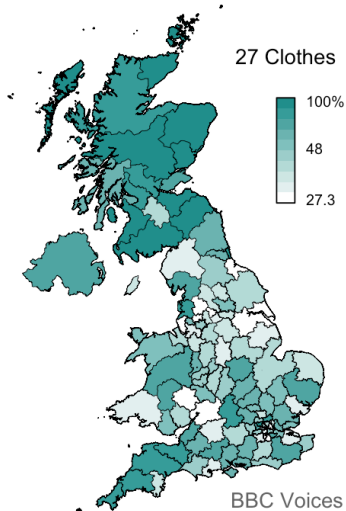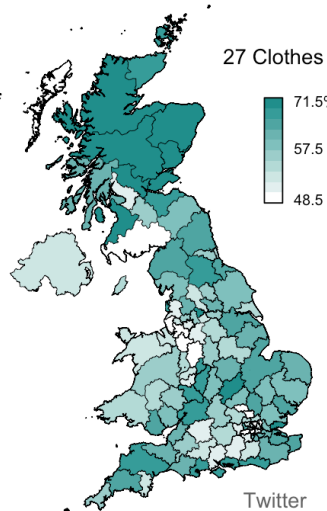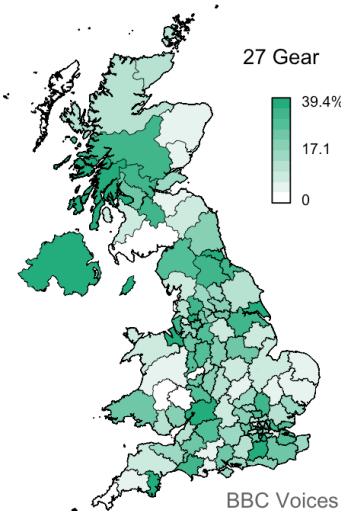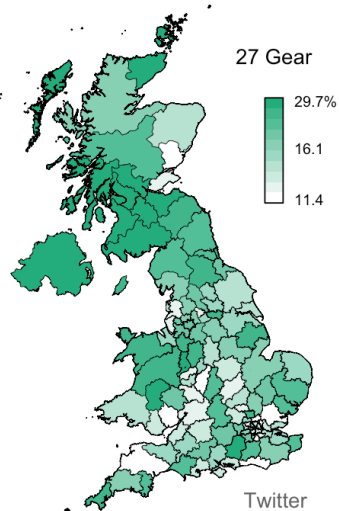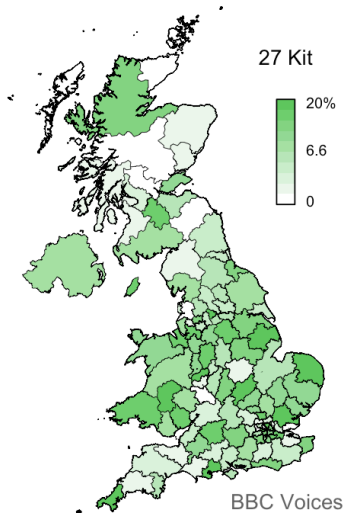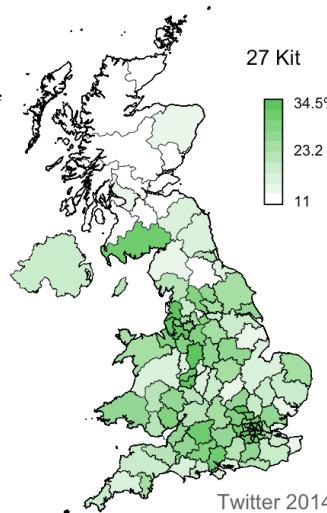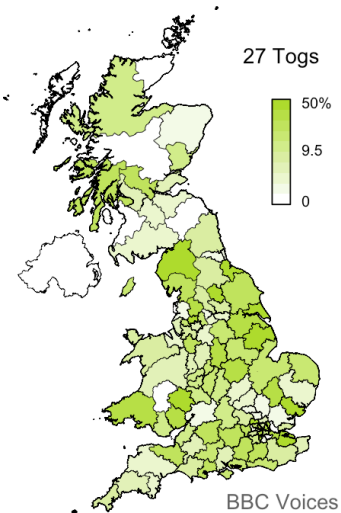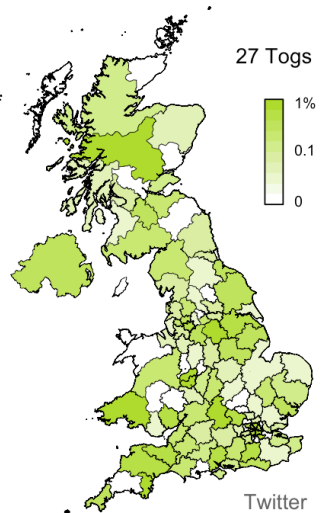

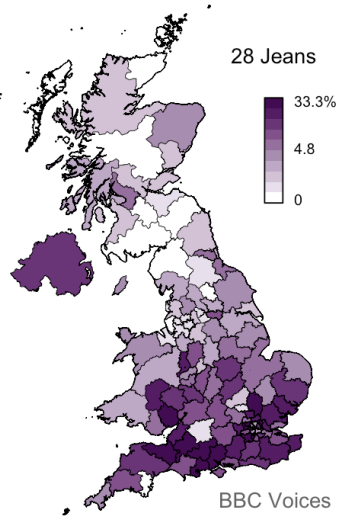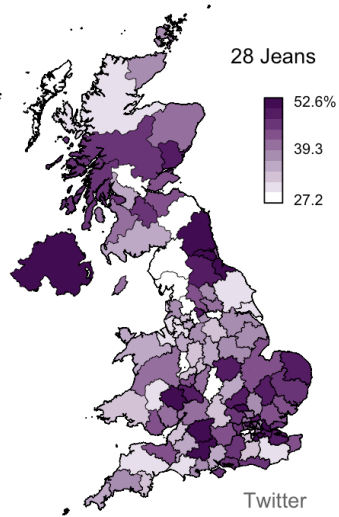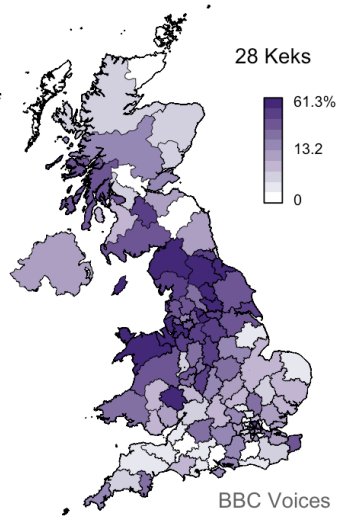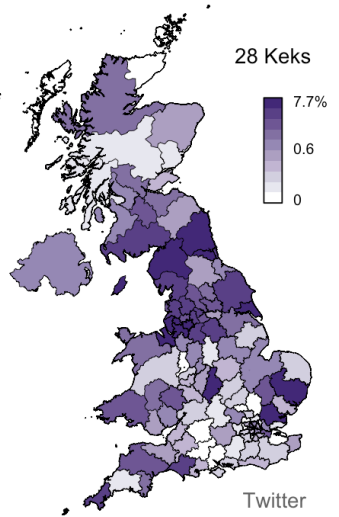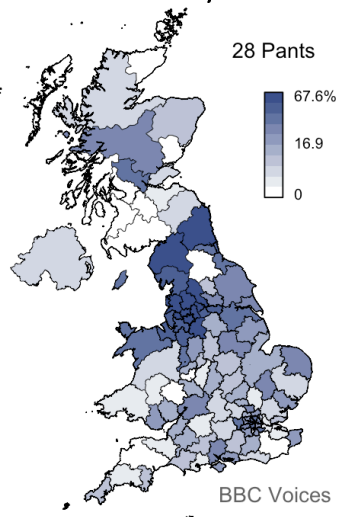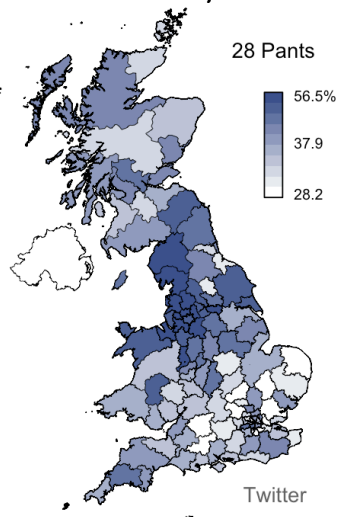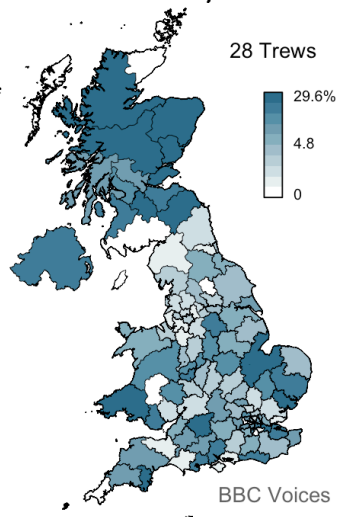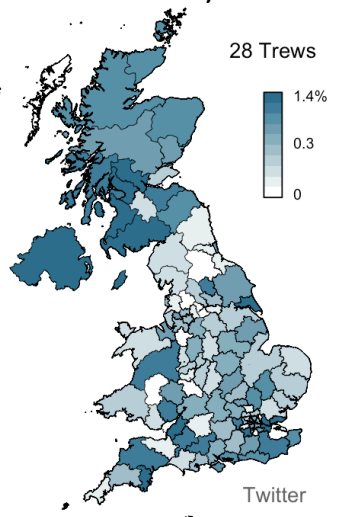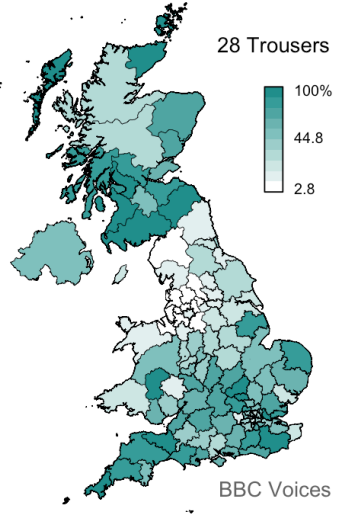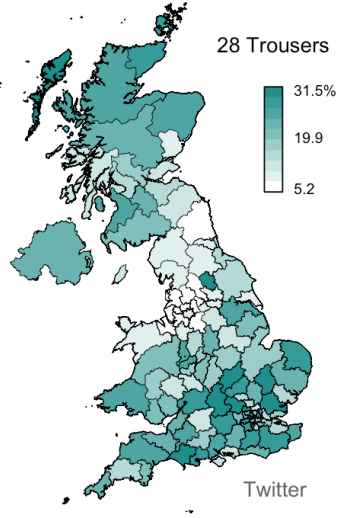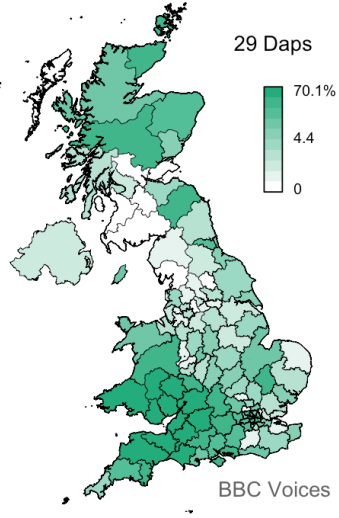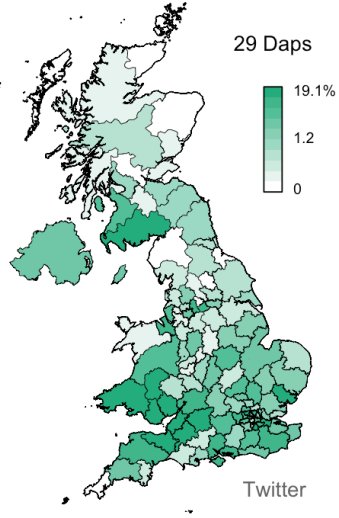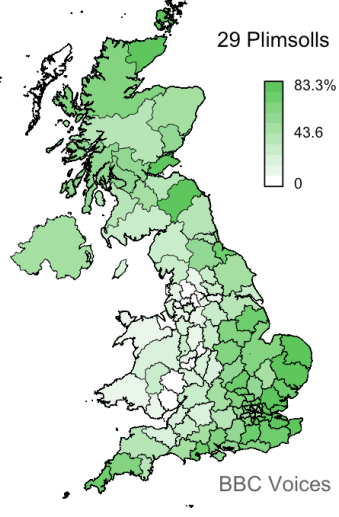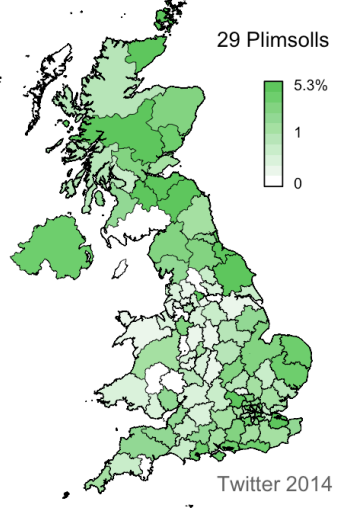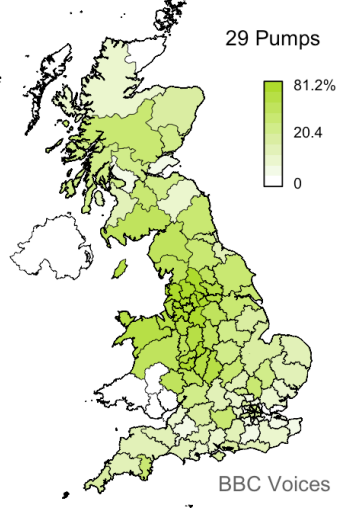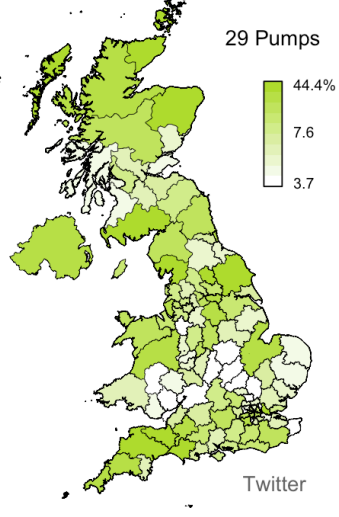

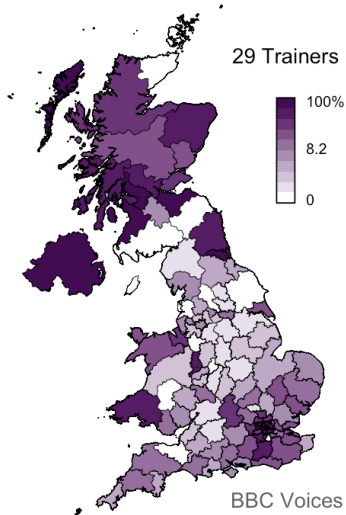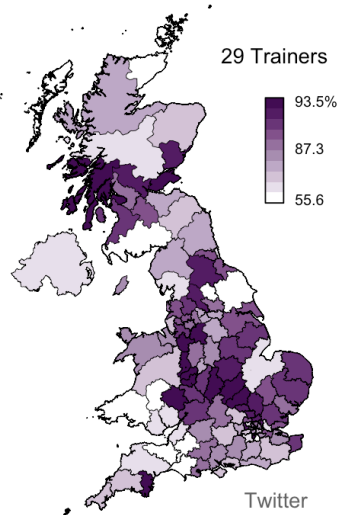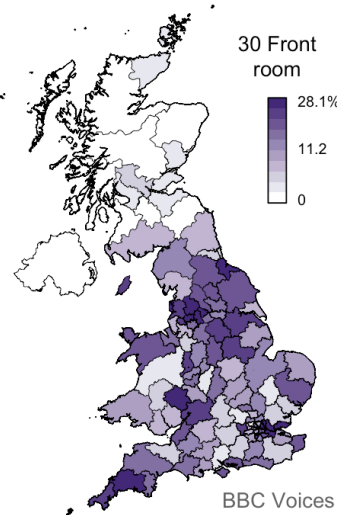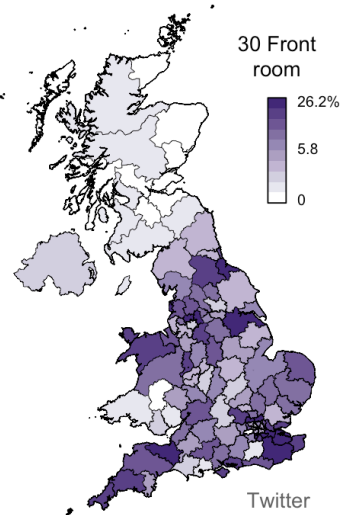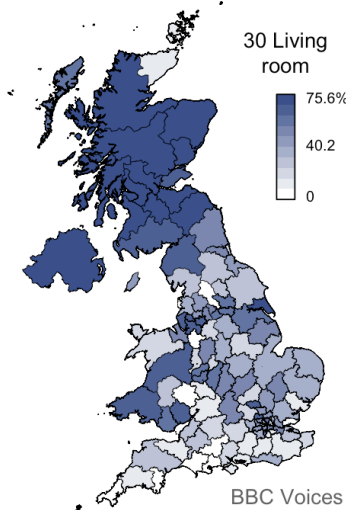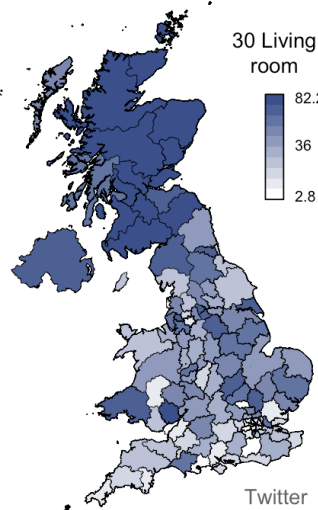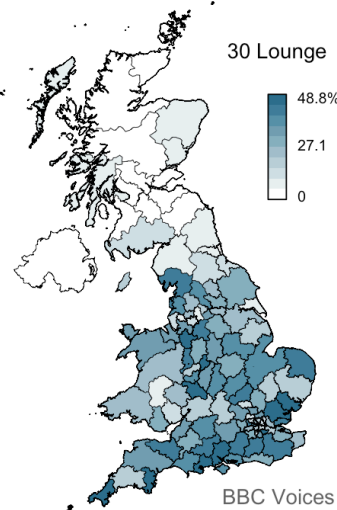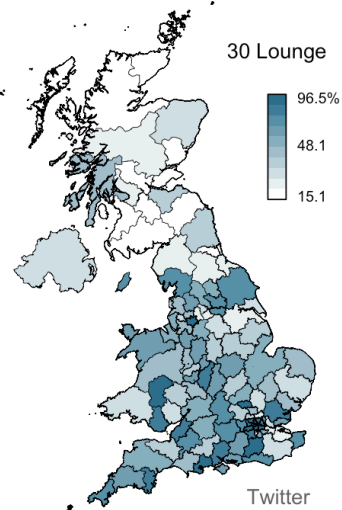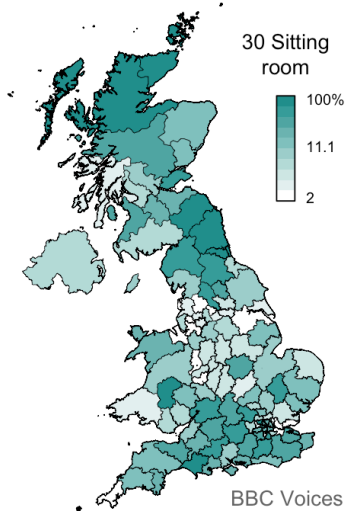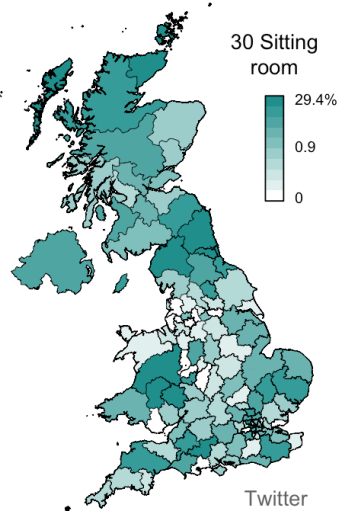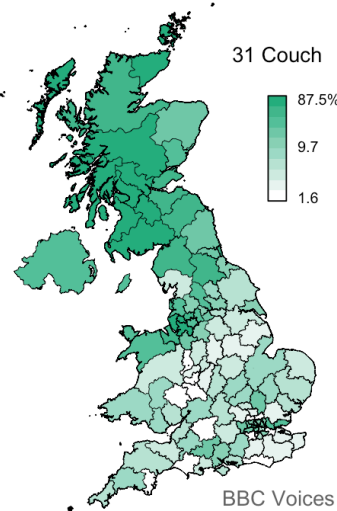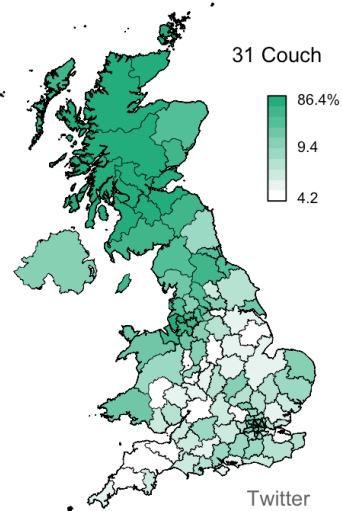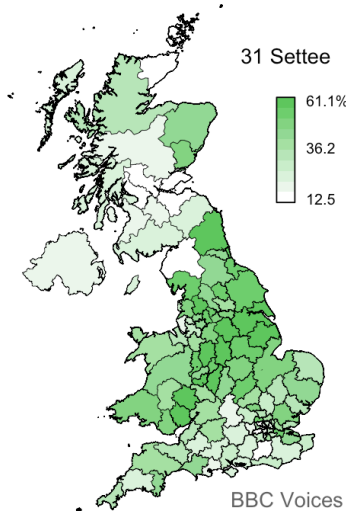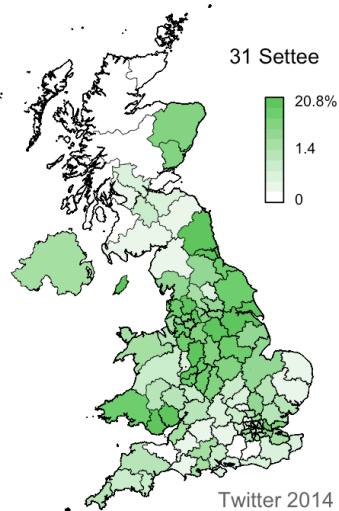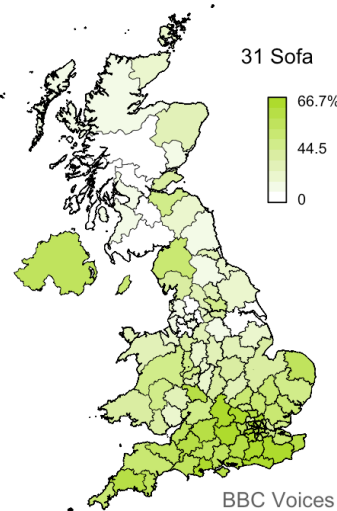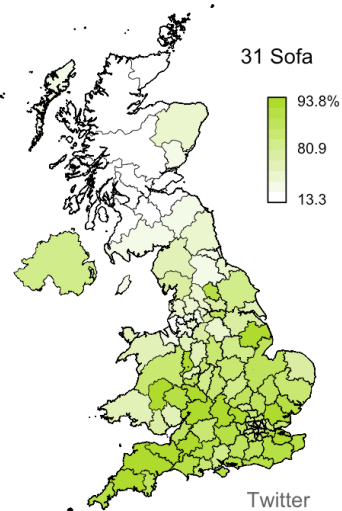

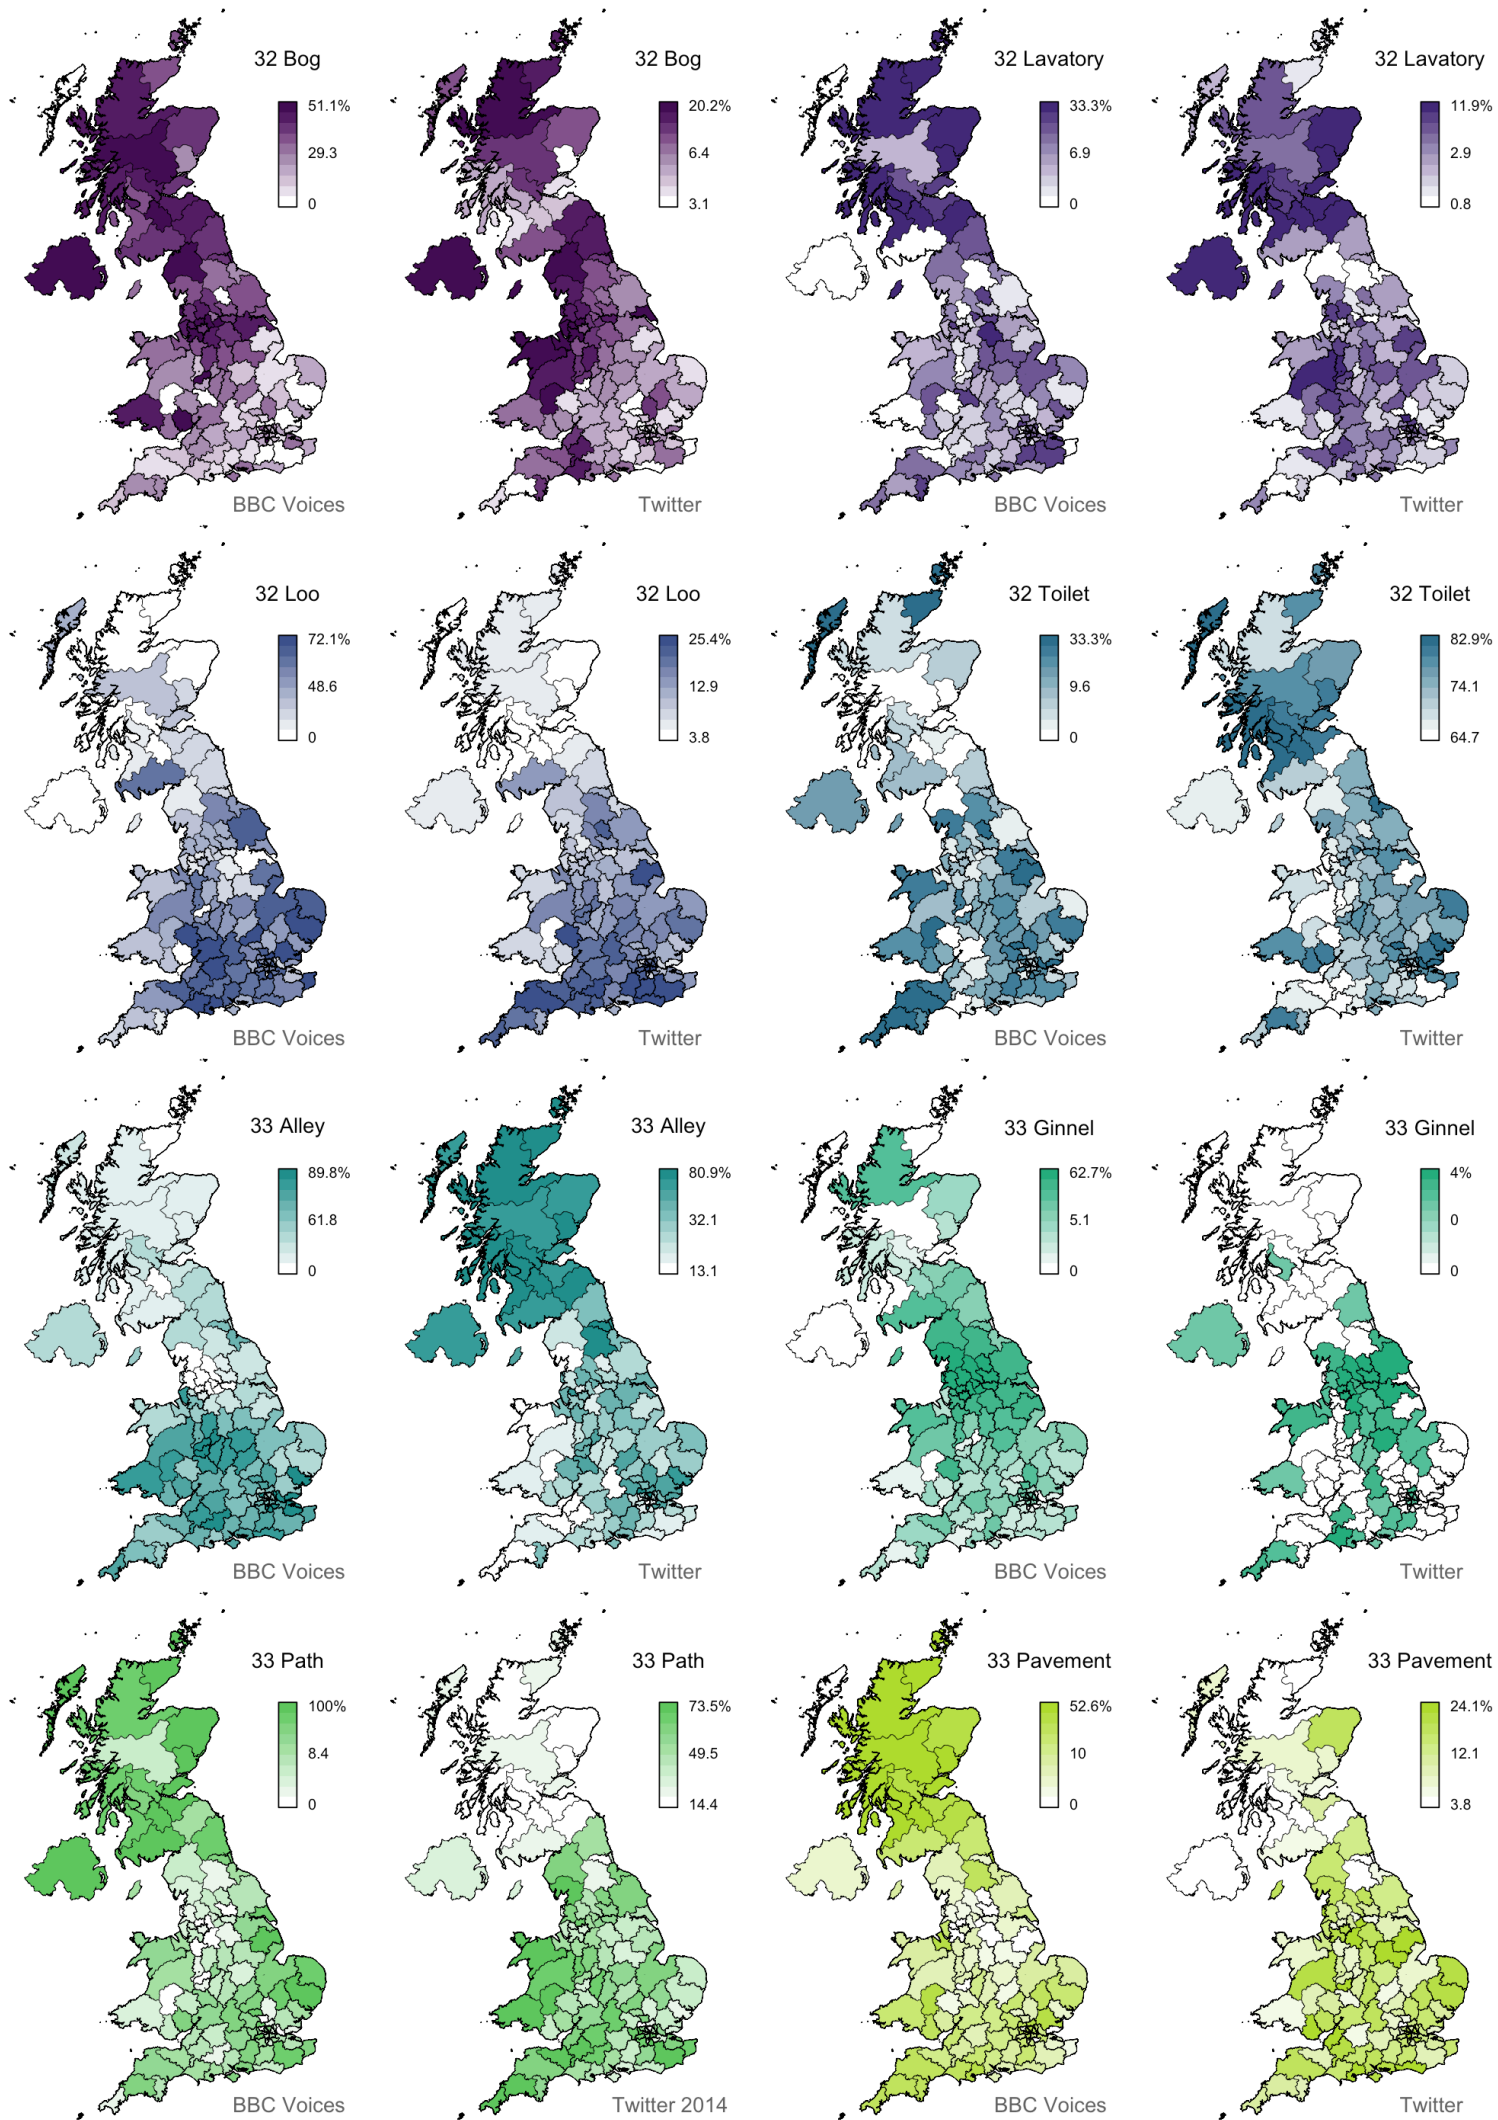

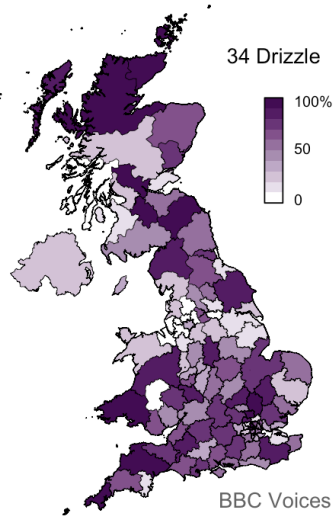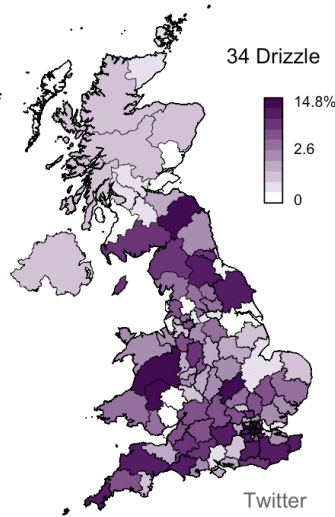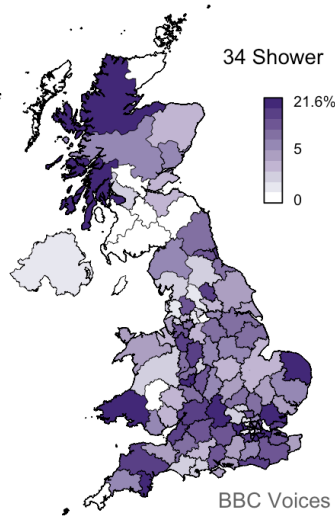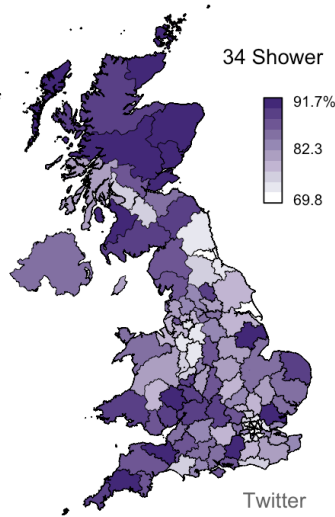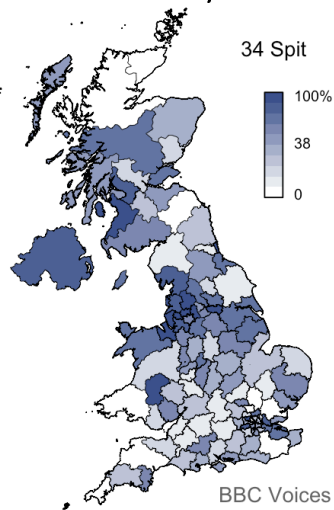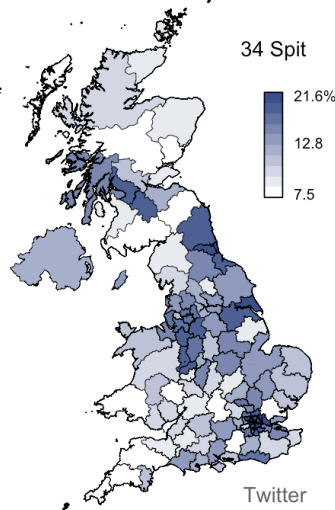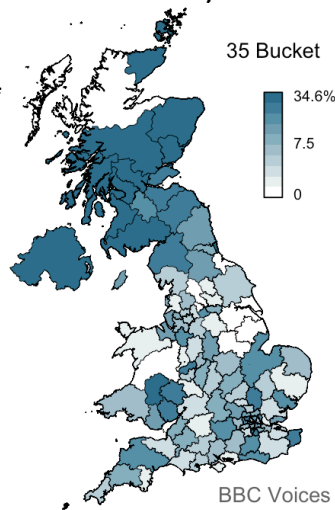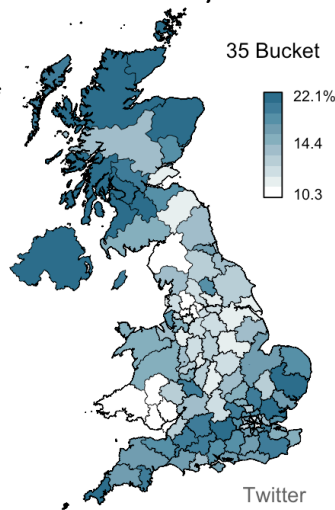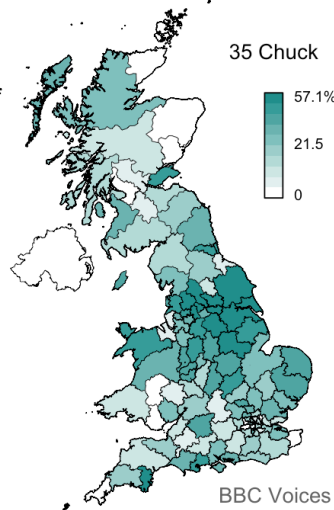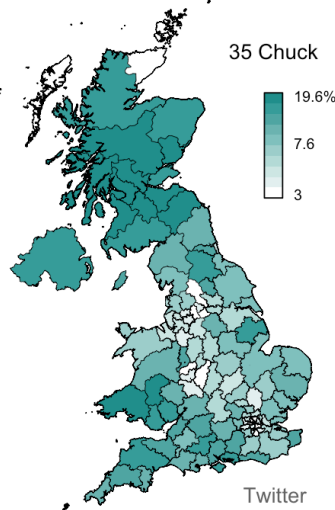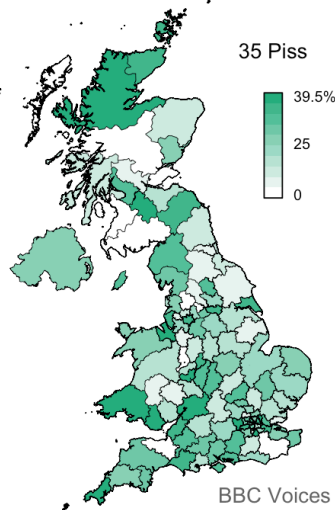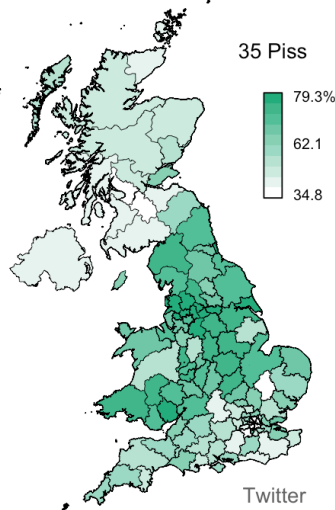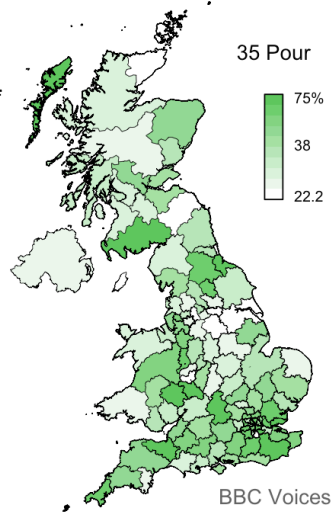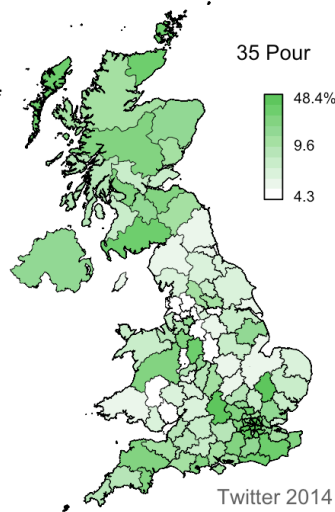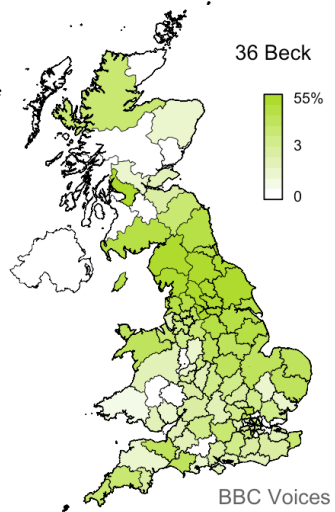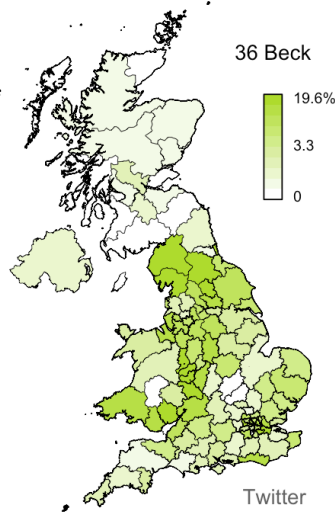

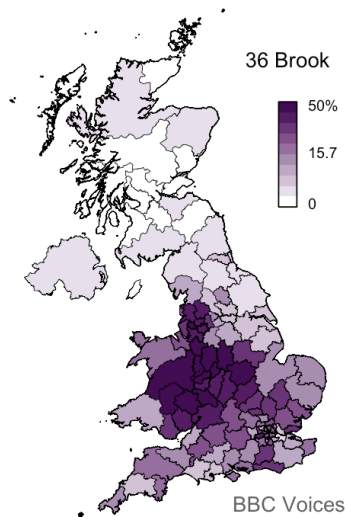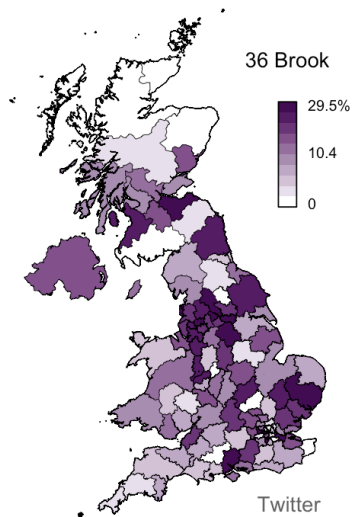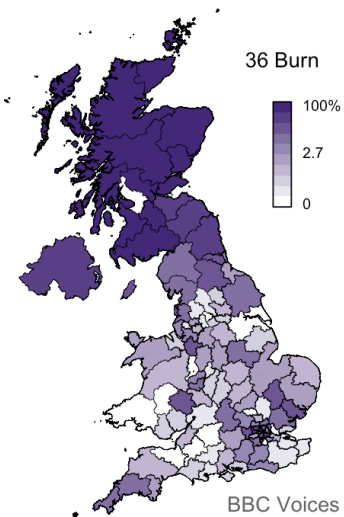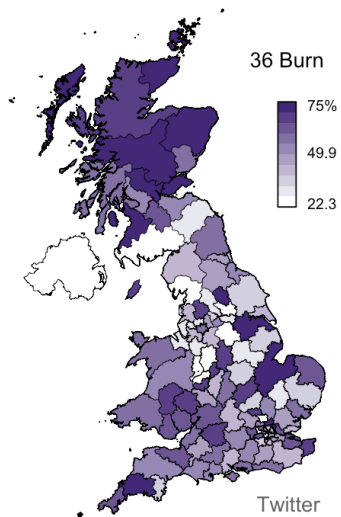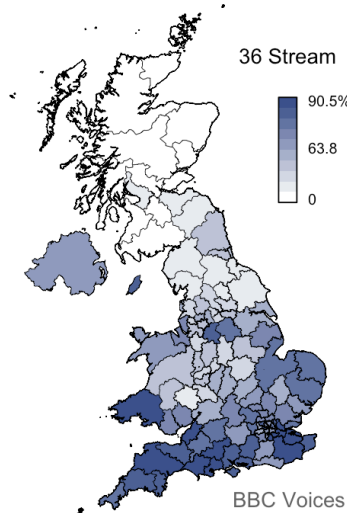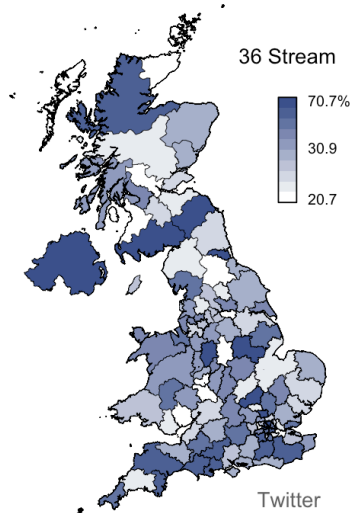

Supplement: Supplementary file 2 [file 21931599]
